# Supplementary material for: RAS-p110α signalling in macrophages is required for effective inflammatory response and resolution of inflammation
Source: Research Square preprint supplement (doi:10.21203/rs.3.rs-3191814/v1), 2023-08-18
Supplement: Supplementary file 1 [file 5df3a3aef7452743cbd109b9.xlsx]

## Sheet: RBD|-Phag vs WT|-Phag
db_ID	UniProt_EntryName	Gene_Name	log2(FC)	AveSignal	t-statistic	p.value	Peptide	Protein_Description
p06759	1433B_MOUSE	Ywhab	-1.78402	52.5879	-2.21177	0.0364017	YLSEVASGENK	14-3-3 protein beta/alpha OS=Mus musculus GN=Ywhab PE=1 SV=3
p06718	1433E_MOUSE	Ywhae	-4.94857	91.2149	-4.07694	0.000717391	YLAEFATGNDR	14-3-3 protein epsilon OS=Mus musculus GN=Ywhae PE=1 SV=1
p00979	1433E_MOUSE	Ywhae	-2.87466	74.0328	-3.17608	0.00423323	EAAENSLVAYK	14-3-3 protein epsilon OS=Mus musculus GN=Ywhae PE=1 SV=1
p06648	1433E_MOUSE	Ywhae	-2.67412	74.7014	-2.60467	0.0162257	YDEMVESMK	14-3-3 protein epsilon OS=Mus musculus GN=Ywhae PE=1 SV=1
p02204	1433E_MOUSE	Ywhae	-3.022	47.4962	-2.21727	0.0363847	HLIPAANTGESK	14-3-3 protein epsilon OS=Mus musculus GN=Ywhae PE=1 SV=1
p04476	1433F_MOUSE	Ywhah	-2.53209	72.1252	-3.04458	0.00597397	NSVVEASEAAYK	14-3-3 protein eta OS=Mus musculus GN=Ywhah PE=1 SV=2
p04513	1433G_MOUSE	Ywhag	-3.74557	90.6479	-3.28468	0.00326535	NVTELNEPLSNEER	14-3-3 protein gamma OS=Mus musculus GN=Ywhag PE=1 SV=2
p04399	1433S_MOUSE	Sfn	-4.41175	105.358	-3.58949	0.00248217	NLLSVAYK	14-3-3 protein sigma OS=Mus musculus GN=Sfn PE=1 SV=2
p01613	1433Z_MOUSE	Ywhaz	-3.29565	100.161	-2.60678	0.0169366	FLIPNASQPESK	14-3-3 protein zeta/delta OS=Mus musculus GN=Ywhaz PE=1 SV=1
p05512	1433Z_MOUSE	Ywhaz	-1.65449	61.1804	-2.34382	0.0273867	SVTEQGAELSNEER	14-3-3 protein zeta/delta OS=Mus musculus GN=Ywhaz PE=1 SV=1
p06719	1433Z_MOUSE	Ywhaz	-2.02942	63.9606	-2.146	0.0444148	YLAEVAAGDDK	14-3-3 protein zeta/delta OS=Mus musculus GN=Ywhaz PE=1 SV=1
p06721	1433Z_MOUSE	Ywhaz	-2.20935	51.2754	-2.09924	0.0461145	YLAEVAAGDDKK	14-3-3 protein zeta/delta OS=Mus musculus GN=Ywhaz PE=1 SV=1
p00191	6PGD_MOUSE	Pgd	-4.88403	92.0893	-3.75973	0.0011627	AGQAVDDFIEK	6-phosphogluconate dehydrogenase, decarboxylating OS=Mus musculus GN=Pgd PE=1 SV=3
p00229	6PGD_MOUSE	Pgd	-5.12285	100.864	-2.98686	0.00661764	AIFQAIAAK	6-phosphogluconate dehydrogenase, decarboxylating OS=Mus musculus GN=Pgd PE=1 SV=3
p02174	6PGD_MOUSE	Pgd	-6.33118	114.466	-4.49578	0.0117578	HEMLPANLIQAQR	6-phosphogluconate dehydrogenase, decarboxylating OS=Mus musculus GN=Pgd PE=1 SV=3
p06006	6PGD_MOUSE	Pgd	-3.34516	88.2133	-2.36582	0.027754	VDDFLANEAK	6-phosphogluconate dehydrogenase, decarboxylating OS=Mus musculus GN=Pgd PE=1 SV=3
p04259	A2MG_MOUSE	A2m	-4.51169	114.778	-2.21407	0.0400755	MVSGFIPLKPTVK	Alpha-2-macroglobulin-P OS=Mus musculus GN=A2mp PE=2 SV=2
p02233	ACTBL_MOUSE	Actbl2	-3.07554	49.5456	-2.44146	0.0259574	HQGVMVGMGQK	Beta-actin-like protein 2 OS=Mus musculus GN=Actbl2 PE=1 SV=1
p02234	ACTBL_MOUSE	Actbl2	-2.96332	48.9759	-2.25737	0.0367499	HQGVMVGMGQK	Beta-actin-like protein 2 OS=Mus musculus GN=Actbl2 PE=1 SV=1
p04623	ACTG_MOUSE	Actg1	-2.53173	65.9307	-2.98046	0.00635075	QEYDESGPSIVHR	Actin, cytoplasmic 2 OS=Mus musculus GN=Actg1 PE=1 SV=1
p02156	ACTG_MOUSE	Actg1	-2.55417	73.1389	-2.92636	0.00722612	GYSFTTTAER	Actin, cytoplasmic 2 OS=Mus musculus GN=Actg1 PE=1 SV=1
p04622	ACTG_MOUSE	Actg1	-2.42095	66.0545	-2.75318	0.0113584	QEYDESGPSIVHR	Actin, cytoplasmic 2 OS=Mus musculus GN=Actg1 PE=1 SV=1
p04621	ACTG_MOUSE	Actg1	-1.61693	84.4202	-2.26244	0.0326643	QEYDESGPSIVHR	Actin, cytoplasmic 2 OS=Mus musculus GN=Actg1 PE=1 SV=1
p03045	ACTN1_MOUSE	Actn1	-4.5163	109.9	-3.04442	0.00826619	LAILGIHNEVSK	Alpha-actinin-1 OS=Mus musculus GN=Actn1 PE=1 SV=1
p04124	ACTN1_MOUSE	Actn1	-2.89387	119.563	-2.59523	0.0236165	MLDAEDIVGTARPDEK	Alpha-actinin-1 OS=Mus musculus GN=Actn1 PE=1 SV=1
p01182	ACTS_MOUSE	Acta1	-2.43244	69.3834	-2.63015	0.0147063	EITALAPSTMK	Actin, alpha skeletal muscle OS=Mus musculus GN=Acta1 PE=1 SV=1
p01183	ACTS_MOUSE	Acta1	-2.93148	91.1639	-2.61054	0.015095	EITALAPSTMK	Actin, alpha skeletal muscle OS=Mus musculus GN=Acta1 PE=1 SV=1
p06778	ACTS_MOUSE	Acta1	-3.29018	137.296	-2.17646	0.0487611	YPIEHGIITNWDDMEK	Actin, alpha skeletal muscle OS=Mus musculus GN=Acta1 PE=1 SV=1
p01467	AINX_MOUSE	Ina	-2.76624	108.045	-2.76189	0.0129056	EYQDLLNVK	Alpha-internexin OS=Mus musculus GN=Ina PE=1 SV=3
p05345	AK1A1_MOUSE	Akr1a1	-4.78376	96.6433	-2.61485	0.0162335	SPAQILLR	Alcohol dehydrogenase [NADP(+)] OS=Mus musculus GN=Akr1a1 PE=1 SV=3
p02193	AK1A1_MOUSE	Akr1a1	-3.24957	49.4951	-2.56713	0.0180166	HHPEDVEPALR	Alcohol dehydrogenase [NADP(+)] OS=Mus musculus GN=Akr1a1 PE=1 SV=3
p01964	AK1A1_MOUSE	Akr1a1	-2.69917	122.988	-2.38362	0.0272421	GLEVTAYSPLGSSDR	Alcohol dehydrogenase [NADP(+)] OS=Mus musculus GN=Akr1a1 PE=1 SV=3
p05344	AKCL2_MOUSE	Akr1e2	-4.78376	96.6433	-2.61485	0.0162335	SPAQILIR	1,5-anhydro-D-fructose reductase OS=Mus musculus GN=Akr1e2 PE=1 SV=1
p02212	AL3A2_MOUSE	Aldh3a2	-3.95411	109.19	-2.67348	0.0204531	HLTPVTLELGGK	Fatty aldehyde dehydrogenase OS=Mus musculus GN=Aldh3a2 PE=1 SV=2
p00056	ALDOA_MOUSE	Aldoa	-4.53586	92.4359	-3.05445	0.00547309	ADDGRPFPQVIK	Fructose-bisphosphate aldolase A OS=Mus musculus GN=Aldoa PE=1 SV=2
p01918	ALDOA_MOUSE	Aldoa	-4.63298	89.0027	-3.21479	0.00584286	GILAADESTGSIAK	Fructose-bisphosphate aldolase A OS=Mus musculus GN=Aldoa PE=1 SV=2
p04531	ALDOA_MOUSE	Aldoa	-4.12109	67.9585	-3.02015	0.00708112	PHPYPALTPEQK	Fructose-bisphosphate aldolase A OS=Mus musculus GN=Aldoa PE=1 SV=2
p01273	ALDOA_MOUSE	Aldoa	-2.20783	43.7152	-2.2153	0.0361287	ELSDIAHR	Fructose-bisphosphate aldolase A OS=Mus musculus GN=Aldoa PE=1 SV=2
p02412	ALDOA_MOUSE	Aldoa	-3.63271	168.832	-2.2584	0.0393983	IGEHTPSALAIMENANVLAR	Fructose-bisphosphate aldolase A OS=Mus musculus GN=Aldoa PE=1 SV=2
p03769	ALDOA_MOUSE	Aldoa	-1.4866	52.8603	-2.15367	0.0411584	LQSIGTENTEENR	Fructose-bisphosphate aldolase A OS=Mus musculus GN=Aldoa PE=1 SV=2
p03770	ALDOA_MOUSE	Aldoa	-1.88103	46.4705	-2.144	0.0424316	LQSIGTENTEENRR	Fructose-bisphosphate aldolase A OS=Mus musculus GN=Aldoa PE=1 SV=2
p06243	ALDOB_MOUSE	Aldob	-2.74732	59.3308	-2.21846	0.0358865	VLAAVYK
p00276	ANXA1_MOUSE	Anxa1	-6.04788	103.193	-4.79025	0.00103039	ALDLELK	Annexin A1 OS=Mus musculus GN=Anxa1 PE=1 SV=2
p05784	ANXA1_MOUSE	Anxa1	-2.57564	93.0582	-2.96344	0.00772084	TPAQFDADELR	Annexin A1 OS=Mus musculus GN=Anxa1 PE=1 SV=2
p04309	APOE_MOUSE	Apoe	22.1947	72.8193	15.0508	1.52273e-09	NEVHTMLGQSTEEIR	Apolipoprotein E OS=Mus musculus GN=Apoe PE=1 SV=2
p03714	APOE_MOUSE	Apoe	-4.92855	99.5101	-3.63721	0.00190406	LQAEIFQAR	Apolipoprotein E OS=Mus musculus GN=Apoe PE=1 SV=2
p04310	APOE_MOUSE	Apoe	-3.65804	96.4655	-2.83217	0.0103425	NEVHTMLGQSTEEIR	Apolipoprotein E OS=Mus musculus GN=Apoe PE=1 SV=2
p05547	APOE_MOUSE	Apoe	-2.6396	71.1201	-2.73495	0.0128131	TANLGAGAAQPLR	Apolipoprotein E OS=Mus musculus GN=Apoe PE=1 SV=2
p03352	APOE_MOUSE	Apoe	-2.80457	68.8599	-2.43673	0.0238701	LGPLVEQGR	Apolipoprotein E OS=Mus musculus GN=Apoe PE=1 SV=2
p01218	APOE_MOUSE	Apoe	-1.75194	101.66	-2.11121	0.0469956	ELEEQLGPVAEETR	Apolipoprotein E OS=Mus musculus GN=Apoe PE=1 SV=2
p04475	ARC1B_MOUSE	Arpc1b	-3.84947	94.0963	-3.56111	0.00197372	NSVSQISVLSGGK	Actin-related protein 2/3 complex subunit 1B OS=Mus musculus GN=Arpc1b PE=1 SV=4
p00495	ARC1B_MOUSE	Arpc1b	-2.63241	65.5071	-2.33971	0.0311197	ASSEGGAATGAGLDSLHK	Actin-related protein 2/3 complex subunit 1B OS=Mus musculus GN=Arpc1b PE=1 SV=4
p02747	ARPC4_MOUSE	Arpc4	-3.81589	111.623	-2.46146	0.0318463	IVAEEFLK	Actin-related protein 2/3 complex subunit 4 OS=Mus musculus GN=Arpc4 PE=1 SV=3
p00264	ARPC5_MOUSE	Arpc5	-2.98346	95.2265	-2.13587	0.0460206	ALAAGGVGSIVR	Actin-related protein 2/3 complex subunit 5 OS=Mus musculus GN=Arpc5 PE=1 SV=3
p06072	B2MG_MOUSE	B2m	-2.69647	94.2189	-2.78021	0.0112597	VEMSDMSFSK	Beta-2-microglobulin OS=Mus musculus GN=B2m PE=1 SV=2
p04950	B4GT5_MOUSE	B4galt5	-5.12767	137.604	-2.96098	0.0325746	RGLLRLPR	Beta-1,4-galactosyltransferase 5 OS=Mus musculus GN=B4galt5 PE=2 SV=2
p00784	BGH3_MOUSE	Tgfbi	-6.07846	106.931	-3.9796	0.00267429	DLLNNHILK	Transforming growth factor-beta-induced protein ig-h3 OS=Mus musculus GN=Tgfbi PE=1 SV=1
p02534	BGH3_MOUSE	Tgfbi	-3.22916	91.7803	-2.92801	0.00944749	ILGDPEALR	Transforming growth factor-beta-induced protein ig-h3 OS=Mus musculus GN=Tgfbi PE=1 SV=1
p05299	BGH3_MOUSE	Tgfbi	-3.1589	55.2522	-2.47681	0.0430706	SLQGDKLEVSSK	Transforming growth factor-beta-induced protein ig-h3 OS=Mus musculus GN=Tgfbi PE=1 SV=1
p03725	BLVRB_MOUSE	Blvrb	-3.56425	56.6862	-2.76974	0.0151612	LQDVTDDHIR	Flavin reductase (NADPH) OS=Mus musculus GN=Blvrb PE=1 SV=3
p02283	BLVRB_MOUSE	Blvrb	-6.43583	101.752	-2.77262	0.017038	IAIFGATGR	Flavin reductase (NADPH) OS=Mus musculus GN=Blvrb PE=1 SV=3
p03702	BLVRB_MOUSE	Blvrb	-2.80611	93.7912	-2.38096	0.025988	LPSEGPQPAHVVVGDVR	Flavin reductase (NADPH) OS=Mus musculus GN=Blvrb PE=1 SV=3
p03726	BLVRB_MOUSE	Blvrb	-2.30605	56.0843	-2.27757	0.0316184	LQDVTDDHIR	Flavin reductase (NADPH) OS=Mus musculus GN=Blvrb PE=1 SV=3
p06402	C170B_MOUSE	Cep170b	-2.34826	64.8979	-2.26848	0.0470386	VPEEALK
p04945	C1QA_MOUSE	C1qa	-2.96963	71.1959	-2.40305	0.0308443	RGDEVWIEKDPAK	Complement C1q subcomponent subunit A OS=Mus musculus GN=C1qa PE=1 SV=2
p04781	C1QA_MOUSE	C1qa	-3.25673	161.217	-2.27788	0.0369383	QNPMTLGNVVIFDK	Complement C1q subcomponent subunit A OS=Mus musculus GN=C1qa PE=1 SV=2
p06225	C1QB_MOUSE	C1qb	-1.79175	60.911	-2.3438	0.0290737	VITNANENYEPR	Complement C1q subcomponent subunit B OS=Mus musculus GN=C1qb PE=1 SV=2
p04893	C1QC_MOUSE	C1qc	-3.1408	72.8101	-2.41369	0.0261318	QVSSGGVLLR	Complement C1q subcomponent subunit C OS=Mus musculus GN=C1qc PE=1 SV=2
p00699	CALM_MOUSE	Calm1	-2.42614	101.499	-2.75739	0.0141025	DGNGYISAAELR	Calmodulin OS=Mus musculus GN=Calm1 PE=1 SV=2
p02831	CAP1_MOUSE	Cap1	-9.41797	104.088	-3.03607	0.0299284	KEPALLELEGK	Adenylyl cyclase-associated protein 1 OS=Mus musculus GN=Cap1 PE=1 SV=4
p06413	CAP2_MOUSE	Cap2	-2.72076	77.3442	-2.79951	0.0107842	VPTISINK	Adenylyl cyclase-associated protein 2 OS=Mus musculus GN=Cap2 PE=1 SV=1
p00753	CAPG_MOUSE	Capg	-5.15897	103.735	-4.28752	0.000450119	DLALAIR	Macrophage-capping protein OS=Mus musculus GN=Capg PE=1 SV=2
p02168	CATB_MOUSE	Ctsb	-3.02404	51.6621	-2.34417	0.029051	HEAGDMMGGHAIR	Cathepsin B OS=Mus musculus GN=Ctsb PE=1 SV=2
p06480	CATD_MOUSE	Ctsd	-2.60598	117.141	-2.11768	0.0463851	VSSLPTVYLK	Cathepsin D OS=Mus musculus GN=Ctsd PE=1 SV=1
p01809	CATZ_MOUSE	Ctsz	-2.92733	106.426	-2.99538	0.00781085	GDQLALLGR	Cathepsin Z OS=Mus musculus GN=Ctsz PE=1 SV=1
p04509	CATZ_MOUSE	Ctsz	-2.14611	73.5613	-2.49845	0.0209077	NVNGVNYASVTR	Cathepsin Z OS=Mus musculus GN=Ctsz PE=1 SV=1
p05934	CATZ_MOUSE	Ctsz	-5.34704	108.296	-2.50599	0.0370851	TYPRPHEYLSPADLPK	Cathepsin Z OS=Mus musculus GN=Ctsz PE=1 SV=1
p06146	CATZ_MOUSE	Ctsz	-1.63263	57.3797	-2.07839	0.0481506	VGDYGSLSGR	Cathepsin Z OS=Mus musculus GN=Ctsz PE=1 SV=1
p03549	CAZA1_MOUSE	Capza1	-4.00091	133.316	-2.9664	0.00968422	LLLNNDNLLR	F-actin-capping protein subunit alpha-1 OS=Mus musculus GN=Capza1 PE=1 SV=4
p02516	CBPC4_MOUSE	Agbl1	-3.44246	62.5793	-3.60858	0.0117056	ILEDIR
p02009	CD14_MOUSE	Cd14	-5.48089	69.6199	-3.77054	0.00374835	GNPFLDSESHSEK	Monocyte differentiation antigen CD14 OS=Mus musculus GN=Cd14 PE=1 SV=1
p05410	CFAB_MOUSE	Cfb	-2.41188	68.968	-2.93192	0.00800278	SSDADWVTEK	Complement factor B OS=Mus musculus GN=Cfb PE=1 SV=2
p05461	CFAB_MOUSE	Cfb	-2.5225	79.6758	-2.88783	0.00884227	STGSWSDLQTR	Complement factor B OS=Mus musculus GN=Cfb PE=1 SV=2
p00309	CFAB_MOUSE	Cfb	-2.96764	69.3205	-2.54414	0.0193818	ALFVSEQGK	Complement factor B OS=Mus musculus GN=Cfb PE=1 SV=2
p03658	CFAB_MOUSE	Cfb	-2.07803	47.7847	-2.25765	0.0348142	LNQISYEDHK	Complement factor B OS=Mus musculus GN=Cfb PE=1 SV=2
p02766	CLH1_MOUSE	Cltc	-4.71991	110.086	-3.10002	0.021761	IVLDNSVFSEHR	Clathrin heavy chain 1 OS=Mus musculus GN=Cltc PE=1 SV=3
p04426	CLH1_MOUSE	Cltc	-2.74538	130.323	-2.46641	0.0263096	NNLAGAEELFAR	Clathrin heavy chain 1 OS=Mus musculus GN=Cltc PE=1 SV=3
p02135	CLIC1_MOUSE	Clic1	-4.64918	105.067	-4.0511	0.0103925	GVTFNVTTVDTK	Chloride intracellular channel protein 1 OS=Mus musculus GN=Clic1 PE=1 SV=3
p02325	CLUS_MOUSE	Clu	-4.62606	79.6926	-4.1869	0.00428537	IDSLLESDR	Clusterin OS=Mus musculus GN=Clu PE=1 SV=1
p00469	CLUS_MOUSE	Clu	-3.27112	164.327	-2.22612	0.0481417	ASGIIDTLFQDR	Clusterin OS=Mus musculus GN=Clu PE=1 SV=1
p05868	CMPK2_MOUSE	Cmpk2	-4.76052	103.116	-4.28402	0.00132695	TTLTQSVSESLK	UMP-CMP kinase 2, mitochondrial OS=Mus musculus GN=Cmpk2 PE=1 SV=2
p06340	CO3_MOUSE	C3	-3.18535	49.7371	-2.3882	0.0297239	VLVVTQGSNAK	Complement C3 OS=Mus musculus GN=C3 PE=1 SV=3
p02430	CO3_MOUSE	C3	-2.88025	48.1407	-2.42886	0.0320102	IGQQEVEVK	Complement C3 OS=Mus musculus GN=C3 PE=1 SV=3
p05877	CO3_MOUSE	C3	-3.45744	73.3872	-2.42309	0.0323482	TVAIHTLDPEK	Complement C3 OS=Mus musculus GN=C3 PE=1 SV=3
p01339	CO9_MOUSE	C9	-3.00029	86.7163	-2.23161	0.0348944	EQAILLK
p06638	COF2_MOUSE	Cfl2	-2.04667	97.7	-2.21212	0.0363745	YALYDATYETK	Cofilin-2 OS=Mus musculus GN=Cfl2 PE=1 SV=1
p06126	COF2_MOUSE	Cfl2	-2.65252	38.9872	-2.19459	0.0396555	VFNDMK	Cofilin-2 OS=Mus musculus GN=Cfl2 PE=1 SV=1
p06159	COR1C_MOUSE	Coro1c	-9.33812	100.827	-5.82675	0.00230764	VGIVAWHPTAR	Coronin-1C OS=Mus musculus GN=Coro1c PE=1 SV=2
p01216	COTL1_MOUSE	Cotl1	-3.93733	106.132	-2.81318	0.013197	ELEEDFIR	Coactosin-like protein OS=Mus musculus GN=Cotl1 PE=1 SV=3
p05687	CXL16_MOUSE	Cxcl16	-3.30823	106.168	-2.24563	0.0488901	TISSGTQIPQGTLDHIR	C-X-C motif chemokine 16 OS=Mus musculus GN=Cxcl16 PE=1 SV=2
p05638	CYC_MOUSE	Cycs	-2.18116	66.4304	-2.34444	0.0308218	TGQAAGFSYTDANK	Cytochrome c, somatic OS=Mus musculus GN=Cycs PE=1 SV=2
p04691	CYTB_MOUSE	Cstb	-4.31383	131.469	-2.58969	0.0175732	QIVAGTNLFIK	Cystatin-B OS=Mus musculus GN=Cstb PE=1 SV=1
p04139	CYTC_MOUSE	Cst3	-2.15597	76.2118	-2.50011	0.020833	MLGAPEEADANEEGVRR	Cystatin-C OS=Mus musculus GN=Cst3 PE=1 SV=2
p04135	CYTC_MOUSE	Cst3	-1.62012	74.4551	-2.39501	0.0265988	MLGAPEEADANEEGVR	Cystatin-C OS=Mus musculus GN=Cst3 PE=1 SV=2
p06069	DESM_MOUSE	Des	-2.46983	78.8791	-2.81348	0.00943565	VELQELNDR	Desmin OS=Mus musculus GN=Des PE=1 SV=3
p05053	DPYL2_MOUSE	Dpysl2	-5.31158	62.8757	-2.45457	0.0269277	SAAEVIAQAR	Dihydropyrimidinase-related protein 2 OS=Mus musculus GN=Dpysl2 PE=1 SV=2
p06128	DPYL2_MOUSE	Dpysl2	-3.85889	109.402	-2.56445	0.0338831	VFNLYPR	Dihydropyrimidinase-related protein 2 OS=Mus musculus GN=Dpysl2 PE=1 SV=2
p02552	DX39B_MOUSE	Ddx39b	-2.613	48.7637	-2.77324	0.0136511	ILNDVQDR	Spliceosome RNA helicase Ddx39b OS=Mus musculus GN=Ddx39b PE=1 SV=1
p06844	EF1A1_MOUSE	Eef1a1	-4.12524	107.778	-3.65806	0.00236271	YYVTIIDAPGHR	Elongation factor 1-alpha 1 OS=Mus musculus GN=Eef1a1 PE=1 SV=3
p06845	EF1A1_MOUSE	Eef1a1	-2.96104	107.143	-2.43434	0.0224414	YYVTIIDAPGHR	Elongation factor 1-alpha 1 OS=Mus musculus GN=Eef1a1 PE=1 SV=3
p06658	EF1A1_MOUSE	Eef1a1	-3.49136	44.369	-2.41229	0.0347332	YEEIVK	Elongation factor 1-alpha 1 OS=Mus musculus GN=Eef1a1 PE=1 SV=3
p02417	EF1A2_MOUSE	Eef1a2	-4.29403	90.3055	-3.79271	0.0016188	IGGIGTVPVGR	Elongation factor 1-alpha 2 OS=Mus musculus GN=Eef1a2 PE=1 SV=1
p04727	EF1A2_MOUSE	Eef1a2	-4.94584	70.6834	-2.84723	0.0148455	QLIVGVNK	Elongation factor 1-alpha 2 OS=Mus musculus GN=Eef1a2 PE=1 SV=1
p03694	EF1A2_MOUSE	Eef1a2	-2.85549	96.4327	-2.2875	0.0327168	LPLQDVYK	Elongation factor 1-alpha 2 OS=Mus musculus GN=Eef1a2 PE=1 SV=1
p00315	EF1G_MOUSE	Eef1g	-3.09868	92.6583	-2.5309	0.023174	ALIAAQYSGAQVR	Elongation factor 1-gamma OS=Mus musculus GN=Eef1g PE=1 SV=3
p06134	EF2_MOUSE	Eef2	-5.47746	101.589	-3.86808	0.00125048	VFSGVVSTGLK	Elongation factor 2 OS=Mus musculus GN=Eef2 PE=1 SV=2
p02820	EF2_MOUSE	Eef2	-6.73345	77.9726	-2.68055	0.021597	KEDLYLKPIQR	Elongation factor 2 OS=Mus musculus GN=Eef2 PE=1 SV=2
p06367	EF2_MOUSE	Eef2	-2.18443	105.168	-2.1577	0.0427636	VNFTVDQIR	Elongation factor 2 OS=Mus musculus GN=Eef2 PE=1 SV=2
p03798	EFHD2_MOUSE	Efhd2	-3.81234	92.122	-3.22893	0.0241747	LSEIDVSTEGVK	EF-hand domain-containing protein D2 OS=Mus musculus GN=Efhd2 PE=1 SV=1
p03618	ENOA_MOUSE	Eno1	-3.67675	95.5904	-3.06763	0.00530362	LMIEMDGTENK	Alpha-enolase OS=Mus musculus GN=Eno1 PE=1 SV=3
p02405	ENOA_MOUSE	Eno1	-3.29383	67.2574	-2.50531	0.0191547	IGAEVYHNLK	Alpha-enolase OS=Mus musculus GN=Eno1 PE=1 SV=3
p01016	ENOA_MOUSE	Eno1	-7.04595	99.74	-2.6493	0.0213835	EALELLK	Alpha-enolase OS=Mus musculus GN=Eno1 PE=1 SV=3
p02133	ENOA_MOUSE	Eno1	-2.37495	51.1375	-2.11197	0.0490406	GVSQAVEHINK	Alpha-enolase OS=Mus musculus GN=Eno1 PE=1 SV=3
p06653	ENOG_MOUSE	Eno2	-3.60828	96.1053	-3.82381	0.000877656	YDLDFK	Gamma-enolase OS=Mus musculus GN=Eno2 PE=1 SV=2
p01238	ENPL_MOUSE	Hsp90b1	-2.82702	92.9998	-2.58492	0.0182277	ELISNASDALDK	Endoplasmin OS=Mus musculus GN=Hsp90b1 PE=1 SV=2
p05559	EPCR_MOUSE	Procr	-2.14024	70.7607	-2.41957	0.0239013	TAVWVSGSQEPSK	Endothelial protein C receptor OS=Mus musculus GN=Procr PE=1 SV=3
p01997	EPIPL_MOUSE	Eppk1	-3.76146	111.725	-2.38976	0.0263815	GLVGLELK	Epiplakin OS=Mus musculus GN=Eppk1 PE=1 SV=2
p02129	FKB1A_MOUSE	Fkbp1a	-1.81219	74.0077	-2.30032	0.030102	GVQVETISPGDGR	Peptidyl-prolyl cis-trans isomerase FKBP1A OS=Mus musculus GN=Fkbp1a PE=1 SV=2
p01776	FLNA_MOUSE	Flna	-3.95049	102.03	-3.49216	0.00304635	GAGTGGLGLAVEGPSEAK	Filamin-A OS=Mus musculus GN=Flna PE=1 SV=5
p06490	FLNA_MOUSE	Flna	-2.27785	77.3869	-2.80382	0.0103836	VTAQGPGLEPSGNIANK	Filamin-A OS=Mus musculus GN=Flna PE=1 SV=5
p00141	FLNA_MOUSE	Flna	-2.45944	76.2874	-2.69098	0.0125499	AFGPGLQGGNAGSPAR	Filamin-A OS=Mus musculus GN=Flna PE=1 SV=5
p01002	FLNA_MOUSE	Flna	-4.01208	102.977	-2.74278	0.0159827	EAGAGGLAIAVEGPSK	Filamin-A OS=Mus musculus GN=Flna PE=1 SV=5
p03901	FLNA_MOUSE	Flna	-2.61403	102.973	-2.60836	0.0178585	LTVSSLQESGLK	Filamin-A OS=Mus musculus GN=Flna PE=1 SV=5
p06076	FLNA_MOUSE	Flna	-2.23963	79.759	-2.5462	0.0184574	VEPGLGADNSVVR	Filamin-A OS=Mus musculus GN=Flna PE=1 SV=5
p01640	FLNA_MOUSE	Flna	-4.32562	153.839	-2.68374	0.0232049	FNEEHIPDSPFVVPVASPSGDAR	Filamin-A OS=Mus musculus GN=Flna PE=1 SV=5
p00616	FLNB_MOUSE	Flnb	-3.11789	122.932	-2.20846	0.0496452	DAGEGLLAVQITDQEGKPQR	Filamin-B OS=Mus musculus GN=Flnb PE=1 SV=3
p01763	G3P_MOUSE	Gapdh	-3.07285	76.4592	-2.99211	0.00786654	GAAQNIIPASTGAAK	Glyceraldehyde-3-phosphate dehydrogenase OS=Mus musculus GN=Gapdh PE=1 SV=2
p06215	G3P_MOUSE	Gapdh	-4.02775	68.4228	-2.59584	0.0498006	VIPELNGK	Glyceraldehyde-3-phosphate dehydrogenase OS=Mus musculus GN=Gapdh PE=1 SV=2
p03993	GDIA_MOUSE	Gdi1	-3.27229	61.3318	-2.96724	0.00914443	LYSESLAR	Rab GDP dissociation inhibitor alpha OS=Mus musculus GN=Gdi1 PE=1 SV=3
p05571	GDIR1_MOUSE	Arhgdia	-4.47737	91.1296	-3.37305	0.00341656	TDYMVGSYGPR	Rho GDP-dissociation inhibitor 1 OS=Mus musculus GN=Arhgdia PE=1 SV=3
p00901	GELS_MOUSE	Gsn	-3.12865	55.8112	-2.57406	0.0197957	DSQEEEKTEALTSAK	Gelsolin OS=Mus musculus GN=Gsn PE=1 SV=3
p02970	GLRX1_MOUSE	Glrx	-5.3355	134.095	-2.40165	0.0435832	KTQEILSQLPFK	Glutaredoxin-1 OS=Mus musculus GN=Glrx PE=1 SV=3
p00587	GPNMB_MOUSE	Gpnmb	-2.83813	68.8972	-2.64041	0.0153481	AYIPISK	Transmembrane glycoprotein NMB OS=Mus musculus GN=Gpnmb PE=1 SV=2
p04449	BIP_MOUSE	Hspa5	-3.45163	104.347	-3.49851	0.00398348	NQLTSNPENTVFDAK	78 kDa glucose-regulated protein OS=Mus musculus GN=Hspa5 PE=1 SV=3
p02725	BIP_MOUSE	Hspa5	-3.33011	39.7424	-2.77912	0.032822	ITITNDQNR	78 kDa glucose-regulated protein OS=Mus musculus GN=Hspa5 PE=1 SV=3
p00065	GSTM1_MOUSE	Gstm1	-3.94078	89.4941	-3.16945	0.00640877	ADIVENQVMDTR	Glutathione S-transferase Mu 1 OS=Mus musculus GN=Gstm1 PE=1 SV=2
p06698	GSTM1_MOUSE	Gstm1	-3.70752	111.451	-2.41917	0.0424167	YIATPIFSK	Glutathione S-transferase Mu 1 OS=Mus musculus GN=Gstm1 PE=1 SV=2
p02052	GSTO1_MOUSE	Gsto1	-1.99845	72.0823	-2.36205	0.0313031	GSAPPGPVPEGQIR	Glutathione S-transferase omega-1 OS=Mus musculus GN=Gsto1 PE=1 SV=2
p04155	GSTP2_MOUSE	Gstp2	-4.48819	106.34	-3.26708	0.0141165	MLLADQGQSWK	Glutathione S-transferase P 2 OS=Mus musculus GN=Gstp2 PE=1 SV=2
p00472	H12_MOUSE	H1-2	-5.25601	100.433	-2.28444	0.0415796	ASGPPVSELITK	Histone H1.2 OS=Mus musculus GN=Hist1h1c PE=1 SV=2
p00263	H1T_MOUSE	H1-6	-3.70967	71.8877	-3.13548	0.014205	ALAAAGYDVEK	Histone H1t OS=Mus musculus GN=Hist1h1t PE=1 SV=4
p03550	H2B3B_MOUSE	H2bc26	-3.27825	120.764	-2.15365	0.0415869	LLLPGELAK	Histone H2B type 3-B OS=Mus musculus GN=Hist3h2bb PE=1 SV=3
p06120	H4_MOUSE	H4c1	-2.83722	127.923	-2.09803	0.0476831	VFLENVIR	Histone H4 OS=Mus musculus GN=Hist1h4a PE=1 SV=2
p02415	HBA_MOUSE	Hba	-3.125	77.1122	-2.80311	0.0114	IGGHGAEYGAEALER	Hemoglobin subunit alpha OS=Mus musculus GN=Hba PE=1 SV=2
p05079	HCLS1_MOUSE	Hcls1	-4.90365	66.8535	-4.31673	0.00201305	SAVGHEYVADVEK	Hematopoietic lineage cell-specific protein OS=Mus musculus GN=Hcls1 PE=1 SV=2
p05577	HCLS1_MOUSE	Hcls1	-6.34882	65.0939	-3.0657	0.0121134	TEHINIHQLR	Hematopoietic lineage cell-specific protein OS=Mus musculus GN=Hcls1 PE=1 SV=2
p05871	HCLS1_MOUSE	Hcls1	-2.08377	54.2796	-2.19747	0.0400195	TTPIEAASSGAR	Hematopoietic lineage cell-specific protein OS=Mus musculus GN=Hcls1 PE=1 SV=2
p04097	HNRPC_MOUSE	Hnrnpc	-3.73873	160.676	-3.13504	0.0268028	MIAGQVLDINLAAEPK	Heterogeneous nuclear ribonucleoproteins C1/C2 OS=Mus musculus GN=Hnrnpc PE=1 SV=1
p04482	HNRPK_MOUSE	Hnrnpk	-4.19161	78.6374	-3.71861	0.00232693	NTDEMVELR	Heterogeneous nuclear ribonucleoprotein K OS=Mus musculus GN=Hnrnpk PE=1 SV=1
p02076	HNRPK_MOUSE	Hnrnpk	-2.73103	154.768	-2.40249	0.047983	GSYGDLGGPIITTQVTIPK	Heterogeneous nuclear ribonucleoprotein K OS=Mus musculus GN=Hnrnpk PE=1 SV=1
p00100	HPT_MOUSE	Hp	-1.7558	72.6068	-2.20284	0.0389888	AEGDGVYTLNDEK	Haptoglobin OS=Mus musculus GN=Hp PE=1 SV=1
p05873	HS71B_MOUSE	Hspa1b	-2.01744	103.749	-2.1845	0.0385689	TTPSYVAFTDTER	Heat shock 70 kDa protein 1B OS=Mus musculus GN=Hspa1b PE=1 SV=3
p05448	HSP72_MOUSE	Hspa2	-2.45852	67.8461	-2.83019	0.00952075	STAGDTHLGGEDFDNR	Heat shock-related 70 kDa protein 2 OS=Mus musculus GN=Hspa2 PE=1 SV=2
p04935	HSP7C_MOUSE	Hspa8	-3.41241	79.2971	-3.22599	0.00407552	RFDDAVVQSDMK	Heat shock cognate 71 kDa protein OS=Mus musculus GN=Hspa8 PE=1 SV=1
p05388	HSP7C_MOUSE	Hspa8	-4.23679	97.5811	-2.94731	0.00687427	SQIHDIVLVGGSTR	Heat shock cognate 71 kDa protein OS=Mus musculus GN=Hspa8 PE=1 SV=1
p02087	HSP7C_MOUSE	Hspa8	-4.19462	46.3654	-2.85002	0.0174754	GTLDPVEK	Heat shock cognate 71 kDa protein OS=Mus musculus GN=Hspa8 PE=1 SV=1
p04936	HSP7C_MOUSE	Hspa8	-3.5299	78.3422	-2.52628	0.0359402	RFDDAVVQSDMK	Heat shock cognate 71 kDa protein OS=Mus musculus GN=Hspa8 PE=1 SV=1
p03094	HYAS1_MOUSE	Has1	-6.32664	104.929	-3.78341	0.00553463	LAVEALVR	Hyaluronan synthase 1 OS=Mus musculus GN=Has1 PE=1 SV=1
p06185	IF5A2_MOUSE	Eif5a2	-4.94785	158.266	-3.00501	0.0245392	VHLVGIDIFTGK	Eukaryotic translation initiation factor 5A-2 OS=Mus musculus GN=Eif5a2 PE=1 SV=3
p04440	IFIT2_MOUSE	Ifit2	-4.39427	166.207	-2.71446	0.0432893	NQAMALVEEALK	Interferon-induced protein with tetratricopeptide repeats 2 OS=Mus musculus GN=Ifit2 PE=1 SV=1
p03795	IFIT3_MOUSE	Ifit3	-2.05686	60.6365	-2.40543	0.0272129	LSEAQAYVDK	Interferon-induced protein with tetratricopeptide repeats 3 OS=Mus musculus GN=Ifit3 PE=1 SV=1
p04924	IMDH2_MOUSE	Impdh2	-5.82886	112.444	-2.46457	0.0497494	REDLVVAPAGVTLK	Inosine-5'-monophosphate dehydrogenase 2 OS=Mus musculus GN=Impdh2 PE=1 SV=2
p02593	IN80B_MOUSE	Ino80b	-3.02394	62.1543	-2.09968	0.0460726	INLQLR
p03408	INAR2_MOUSE	Ifnar2	-4.07357	150.808	-3.44434	0.0191804	LILSWELENK	Interferon alpha/beta receptor 2 OS=Mus musculus GN=Ifnar2 PE=1 SV=2
p05312	IPO5_MOUSE	Ipo5	-3.1592	123.467	-2.67165	0.0325136	SLVEIADTVPK	Importin-5 OS=Mus musculus GN=Ipo5 PE=1 SV=3
p05337	IQGA1_MOUSE	Iqgap1	-3.93438	156.548	-2.26395	0.0389806	SNQQLENDLNLMDIK	Ras GTPase-activating-like protein IQGAP1 OS=Mus musculus GN=Iqgap1 PE=1 SV=2
p06294	IREB2_MOUSE	Ireb2	-6.12356	93.0765	-4.14877	0.00632847	VLLEAAVR	Iron-responsive element-binding protein 2 OS=Mus musculus GN=Ireb2 PE=1 SV=2
p00293	K1C10_MOUSE	Krt10	-2.06228	77.7488	-2.40683	0.0295624	ALEESNYELEGK	Keratin, type I cytoskeletal 10 OS=Mus musculus GN=Krt10 PE=1 SV=3
p03215	K1C10_MOUSE	Krt10	-2.21032	68.9328	-2.30532	0.0371421	LENEIQTYR	Keratin, type I cytoskeletal 10 OS=Mus musculus GN=Krt10 PE=1 SV=3
p02734	K1C13_MOUSE	Krt13	-3.19166	69.0846	-2.62278	0.0239309	ITMQNLNDR	Keratin, type I cytoskeletal 13 OS=Mus musculus GN=Krt13 PE=1 SV=2
p03084	K1C15_MOUSE	Krt15	-2.49317	56.3493	-2.46981	0.0261346	LASYLDK	Keratin, type I cytoskeletal 15 OS=Mus musculus GN=Krt15 PE=1 SV=2
p04850	K1C18_MOUSE	Krt18	-5.40285	72.8746	-3.50665	0.00578251	QSVESDIHGLR	Keratin, type I cytoskeletal 18 OS=Mus musculus GN=Krt18 PE=1 SV=5
p03154	K1C18_MOUSE	Krt18	-2.79152	81.7654	-2.87725	0.0115982	LEAEIATYR	Keratin, type I cytoskeletal 18 OS=Mus musculus GN=Krt18 PE=1 SV=5
p02452	K1C18_MOUSE	Krt18	-3.44246	62.5793	-3.60858	0.0117056	IIEDLR	Keratin, type I cytoskeletal 18 OS=Mus musculus GN=Krt18 PE=1 SV=5
p03006	K1C18_MOUSE	Krt18	-3.57119	40.3647	-2.50563	0.0278282	KVVDDTNITR	Keratin, type I cytoskeletal 18 OS=Mus musculus GN=Krt18 PE=1 SV=5
p04849	K1C18_MOUSE	Krt18	-5.04432	71.9217	-2.4466	0.0309932	QSVESDIHGLR	Keratin, type I cytoskeletal 18 OS=Mus musculus GN=Krt18 PE=1 SV=5
p01395	K1C18_MOUSE	Krt18	-2.13667	49.4644	-2.31494	0.037795	ETMQDLNDR	Keratin, type I cytoskeletal 18 OS=Mus musculus GN=Krt18 PE=1 SV=5
p00298	K1C19_MOUSE	Krt19	-2.88935	75.7227	-3.07166	0.00782086	ALEQANGELEVK	Keratin, type I cytoskeletal 19 OS=Mus musculus GN=Krt19 PE=1 SV=1
p02770	K1C19_MOUSE	Krt19	-2.95454	92.135	-2.55108	0.0214588	IVLQIDNAR	Keratin, type I cytoskeletal 19 OS=Mus musculus GN=Krt19 PE=1 SV=1
p05280	K1C19_MOUSE	Krt19	-6.80407	107.196	-3.66237	0.0228765	SLLEGQEAHYNNLPTPK	Keratin, type I cytoskeletal 19 OS=Mus musculus GN=Krt19 PE=1 SV=1
p05770	K2C1_MOUSE	Krt1	-3.31559	94.5996	-3.06302	0.00643962	TNAENEFVTIK	Keratin, type II cytoskeletal 1 OS=Mus musculus GN=Krt1 PE=1 SV=4
p04375	K2C5_MOUSE	Krt5	-2.33376	42.6885	-2.51187	0.0240598	NKYEDEINKR	Keratin, type II cytoskeletal 5 OS=Mus musculus GN=Krt5 PE=1 SV=1
p01606	K2C73_MOUSE	Krt73	-2.99541	90.3256	-2.75794	0.0147466	FLEQQNQVLQTK	Keratin, type II cytoskeletal 73 OS=Mus musculus GN=Krt73 PE=1 SV=1
p00479	K2C8_MOUSE	Krt8	-2.97741	124.012	-3.0761	0.00894014	ASLEAAIADAEQR	Keratin, type II cytoskeletal 8 OS=Mus musculus GN=Krt8 PE=1 SV=4
p00083	K2C8_MOUSE	Krt8	-2.84441	76.5293	-2.71838	0.0167635	AEAETMYQIK	Keratin, type II cytoskeletal 8 OS=Mus musculus GN=Krt8 PE=1 SV=4
p05579	K2C8_MOUSE	Krt8	-3.9469	42.7134	-2.37362	0.0420693	TEISEMNR	Keratin, type II cytoskeletal 8 OS=Mus musculus GN=Krt8 PE=1 SV=4
p01975	KATL2_MOUSE	Katnal2	-3.11865	115.754	-2.22528	0.0409258	GLLLYGPPGTGK	Katanin p60 ATPase-containing subunit A-like 2 OS=Mus musculus GN=Katnal2 PE=2 SV=2
p01821	KPYM_MOUSE	Pkm	-5.48083	88.3518	-3.63712	0.00224544	GDYPLEAVR	Pyruvate kinase PKM OS=Mus musculus GN=Pkm PE=1 SV=4
p02727	KPYM_MOUSE	Pkm	-2.7169	97.572	-2.73134	0.0116722	ITLDNAYMEK	Pyruvate kinase PKM OS=Mus musculus GN=Pkm PE=1 SV=4
p03118	KPYM_MOUSE	Pkm	-2.44775	100.758	-2.59838	0.0155194	LDIDSAPITAR	Pyruvate kinase PKM OS=Mus musculus GN=Pkm PE=1 SV=4
p00400	KPYM_MOUSE	Pkm	-2.98742	73.6645	-2.55517	0.0171187	APIIAVTR	Pyruvate kinase PKM OS=Mus musculus GN=Pkm PE=1 SV=4
p02726	KPYM_MOUSE	Pkm	-1.89146	79.6089	-2.32585	0.0357258	ITLDNAYMEK	Pyruvate kinase PKM OS=Mus musculus GN=Pkm PE=1 SV=4
p03015	KRT35_MOUSE	Krt35	-2.71782	62.5285	-2.80882	0.0140432	LAADDFR
p03381	KSYK_MOUSE	Syk	-4.04813	91.9953	-2.94023	0.0115964	LIATTAHEK	Tyrosine-protein kinase SYK OS=Mus musculus GN=Syk PE=1 SV=2
p01875	LASP1_MOUSE	Lasp1	-3.36569	120.216	-2.16514	0.0497789	GFSVVADTPELQR	LIM and SH3 domain protein 1 OS=Mus musculus GN=Lasp1 PE=1 SV=1
p04898	LDHA_MOUSE	Ldha	-2.45961	102.487	-2.42491	0.0240321	QVVDSAYEVIK	L-lactate dehydrogenase A chain OS=Mus musculus GN=Ldha PE=1 SV=3
p05295	LDHA_MOUSE	Ldha	-3.00399	97.6938	-2.38053	0.0286362	SLNPELGTDADKEQWK	L-lactate dehydrogenase A chain OS=Mus musculus GN=Ldha PE=1 SV=3
p06504	LDHA_MOUSE	Ldha	-1.93738	62.5968	-2.18936	0.0381739	VTLTPEEEAR	L-lactate dehydrogenase A chain OS=Mus musculus GN=Ldha PE=1 SV=3
p03928	LDHC_MOUSE	Ldhc	-3.5397	88.5775	-2.49656	0.0232041	LVIITAGAR	L-lactate dehydrogenase C chain OS=Mus musculus GN=Ldhc PE=1 SV=2
p03670	LEG1_MOUSE	Lgals1	-2.46707	52.3501	-2.24855	0.0336523	LPDGHEFK	Galectin-1 OS=Mus musculus GN=Lgals1 PE=1 SV=3
p02007	LEG3_MOUSE	Lgals3	-6.69476	92.9872	-3.44358	0.00274479	GNDVAFHFNPR	Galectin-3 OS=Mus musculus GN=Lgals3 PE=1 SV=3
p05998	LEG3_MOUSE	Lgals3	-5.58638	86.0566	-2.40319	0.0400911	VAVNDAHLLQYNHR	Galectin-3 OS=Mus musculus GN=Lgals3 PE=1 SV=3
p02662	LEG3_MOUSE	Lgals3	-3.02703	110.627	-2.16099	0.0405299	IQVLVEADHFK	Galectin-3 OS=Mus musculus GN=Lgals3 PE=1 SV=3
p05765	LG3BP_MOUSE	Lgals3bp	-4.97194	158.838	-3.66966	0.00824896	TMQALEFHTVPVEVLAK	Galectin-3-binding protein OS=Mus musculus GN=Lgals3bp PE=1 SV=1
p04957	LG3BP_MOUSE	Lgals3bp	-4.44656	74.2695	-3.1068	0.00842948	RIEVSMSSVK	Galectin-3-binding protein OS=Mus musculus GN=Lgals3bp PE=1 SV=1
p04467	LMNA_MOUSE	Lmna	-5.04272	89.4272	-4.0592	0.00104583	NSNLVGAAHEELQQSR	Prelamin-A/C OS=Mus musculus GN=Lmna PE=1 SV=2
p04779	LMNA_MOUSE	Lmna	-5.09759	91.2037	-3.49533	0.00510408	QNGDDPLMTYR	Prelamin-A/C OS=Mus musculus GN=Lmna PE=1 SV=2
p05538	LMNA_MOUSE	Lmna	-3.0984	101.229	-2.76402	0.0128472	TALINSTGEEVAMR	Prelamin-A/C OS=Mus musculus GN=Lmna PE=1 SV=2
p00052	LMNA_MOUSE	Lmna	-2.11498	70.726	-2.68123	0.0140282	AAYEAELGDAR	Prelamin-A/C OS=Mus musculus GN=Lmna PE=1 SV=2
p04370	LMNA_MOUSE	Lmna	-3.13524	76.8388	-2.67009	0.0184195	NIYSEELR	Prelamin-A/C OS=Mus musculus GN=Lmna PE=1 SV=2
p01058	LMNA_MOUSE	Lmna	-1.90549	64.2148	-2.41548	0.0260345	EDLQELNDR	Prelamin-A/C OS=Mus musculus GN=Lmna PE=1 SV=2
p05262	LMNA_MOUSE	Lmna	-2.16373	58.52	-2.29984	0.0305138	SLETENAGLR	Prelamin-A/C OS=Mus musculus GN=Lmna PE=1 SV=2
p04214	LMNA_MOUSE	Lmna	-3.30505	166.934	-2.37432	0.0454684	MQQQLDEYQELLDIK	Prelamin-A/C OS=Mus musculus GN=Lmna PE=1 SV=2
p01826	MARCS_MOUSE	Marcks	-3.38875	46.7507	-2.67646	0.0234949	GEATAERPGEAAVASSPSK	Myristoylated alanine-rich C-kinase substrate OS=Mus musculus GN=Marcks PE=1 SV=2
p03370	MDHC_MOUSE	Mdh1	-4.00894	60.2519	-2.42297	0.0421681	LGVTADDVK	Malate dehydrogenase, cytoplasmic OS=Mus musculus GN=Mdh1 PE=1 SV=3
p06391	MDHM_MOUSE	Mdh2	-2.88262	79.0093	-2.33476	0.0287049	VNVPVIGGHAGK	Malate dehydrogenase, mitochondrial OS=Mus musculus GN=Mdh2 PE=1 SV=3
p02635	MDHM_MOUSE	Mdh2	-2.13121	47.7792	-2.26891	0.0446765	IQEAGTEVVK	Malate dehydrogenase, mitochondrial OS=Mus musculus GN=Mdh2 PE=1 SV=3
p02431	MGN2_MOUSE	Magohb	-4.97218	89.845	-2.54867	0.0444633	IGSLIDVNQSK	Protein mago nashi homolog 2 OS=Mus musculus GN=Magohb PE=2 SV=1
p00354	MOES_MOUSE	Msn	-2.97461	75.1194	-2.72808	0.011517	ALTSELANAR	Moesin OS=Mus musculus GN=Msn PE=1 SV=3
p00434	MOES_MOUSE	Msn	-2.52802	64.8694	-2.58	0.0161816	AQMVQEDLEK	Moesin OS=Mus musculus GN=Msn PE=1 SV=3
p02703	MOES_MOUSE	Msn	-3.11494	66.0825	-2.46731	0.0239588	ISQLEMAR	Moesin OS=Mus musculus GN=Msn PE=1 SV=3
p01144	MYL3_MOUSE	Myl3	-3.41623	73.8148	-2.72613	0.0185632	EGNGTVMGAELR	Myosin light chain 3 OS=Mus musculus GN=Myl3 PE=1 SV=4
p02263	MYL6_MOUSE	Myl6	-7.3313	68.9479	-3.03312	0.00970734	HVLVTLGEK	Myosin light polypeptide 6 OS=Mus musculus GN=Myl6 PE=1 SV=3
p01142	MYL6_MOUSE	Myl6	-3.41623	73.8148	-2.72613	0.0185632	EGNGTVMGAEIR	Myosin light polypeptide 6 OS=Mus musculus GN=Myl6 PE=1 SV=3
p01996	NDKA_MOUSE	Nme1	-3.85147	111.701	-2.40498	0.0255423	GLVGEIIK	Nucleoside diphosphate kinase A OS=Mus musculus GN=Nme1 PE=1 SV=1
p05609	NDKB_MOUSE	Nme2	-3.4951	94.275	-2.63184	0.0156397	TFIAIKPDGVQR	Nucleoside diphosphate kinase B OS=Mus musculus GN=Nme2 PE=1 SV=1
p04354	NDKB_MOUSE	Nme2	-2.46029	55.4624	-2.29505	0.0312463	NIIHGSDSVESAEK	Nucleoside diphosphate kinase B OS=Mus musculus GN=Nme2 PE=1 SV=1
p00219	NEXN_MOUSE	Nexn	-6.04788	103.193	-4.79025	0.00103039	AIDLEIK
p01575	NPM_MOUSE	Npm1	-3.94926	68.8249	-2.80881	0.0149053	FINYVK	Nucleophosmin OS=Mus musculus GN=Npm1 PE=1 SV=1
p06389	NUCB1_MOUSE	Nucb1	-3.1024	67.5055	-3.13641	0.00736016	VNVPGSQAQLK	Nucleobindin-1 OS=Mus musculus GN=Nucb1 PE=1 SV=2
p06732	NUCB1_MOUSE	Nucb1	-2.61106	76.148	-2.94645	0.00802005	YLESLGEEQR	Nucleobindin-1 OS=Mus musculus GN=Nucb1 PE=1 SV=2
p04940	NUCB1_MOUSE	Nucb1	-3.51237	62.9036	-2.73339	0.0124975	RFEEELAAR	Nucleobindin-1 OS=Mus musculus GN=Nucb1 PE=1 SV=2
p03836	NUCB1_MOUSE	Nucb1	-1.88344	54.1369	-2.40157	0.0309315	LSQETEALGR	Nucleobindin-1 OS=Mus musculus GN=Nucb1 PE=1 SV=2
p01992	NUCL_MOUSE	Ncl	-1.96854	70.369	-2.14534	0.0477575	GLSEDTTEETLK	Nucleolin OS=Mus musculus GN=Ncl PE=1 SV=2
p00136	PA2G4_MOUSE	Pa2g4	-6.06403	101.017	-5.21817	0.00130664	AFFSEVER	Proliferation-associated protein 2G4 OS=Mus musculus GN=Pa2g4 PE=1 SV=3
p05188	PABP1_MOUSE	Pabpc1	-5.07333	108.664	-3.16036	0.0163402	SGVGNIFIK	Polyadenylate-binding protein 1 OS=Mus musculus GN=Pabpc1 PE=1 SV=2
p05973	PAFA_MOUSE	Pla2g7	-2.93649	72.2484	-2.94325	0.00807774	VAIDLTNK	Platelet-activating factor acetylhydrolase OS=Mus musculus GN=Pla2g7 PE=2 SV=2
p03996	PAFA_MOUSE	Pla2g7	-2.07246	64.1517	-2.4918	0.0221939	LYYPAQDQGR	Platelet-activating factor acetylhydrolase OS=Mus musculus GN=Pla2g7 PE=2 SV=2
p00345	PAFA_MOUSE	Pla2g7	-4.10205	131.051	-2.46486	0.0395206	ALSAILDIEHGDPK	Platelet-activating factor acetylhydrolase OS=Mus musculus GN=Pla2g7 PE=2 SV=2
p01484	PDIA3_MOUSE	Pdia3	-7.20212	104.945	-3.97623	0.00422774	FAHTNIESLVK	Protein disulfide-isomerase A3 OS=Mus musculus GN=Pdia3 PE=1 SV=2
p01743	PDIA3_MOUSE	Pdia3	-3.918	105.401	-3.21017	0.0127078	FVMQEEFSR	Protein disulfide-isomerase A3 OS=Mus musculus GN=Pdia3 PE=1 SV=2
p03066	PDIA3_MOUSE	Pdia3	-2.41746	63.8209	-2.40951	0.0304658	LAPEYEAAATR	Protein disulfide-isomerase A3 OS=Mus musculus GN=Pdia3 PE=1 SV=2
p03677	PDILT_MOUSE	Pdilt	-6.06177	104.33	-3.26381	0.0325844	LPENPLLK
p01696	PGAM1_MOUSE	Pgam1	-3.91421	123.974	-2.45188	0.0323895	FSGWYDADLSPAGHEEAK	Phosphoglycerate mutase 1 OS=Mus musculus GN=Pgam1 PE=1 SV=3
p06284	PGAM2_MOUSE	Pgam2	-7.41988	66.2407	-4.98291	0.00829759	VLIAAHGNSLR	Phosphoglycerate mutase 2 OS=Mus musculus GN=Pgam2 PE=1 SV=3
p02645	PGK1_MOUSE	Pgk1	-3.09753	132.855	-2.65243	0.0168369	IQLINNMLDK	Phosphoglycerate kinase 1 OS=Mus musculus GN=Pgk1 PE=1 SV=4
p01679	PLD4_MOUSE	Pld4	-4.42425	111.652	-3.11118	0.0112162	FQQLLLR	Phospholipase D4 OS=Mus musculus GN=Pld4 PE=1 SV=1
p00418	PLEC_MOUSE	Plec	-2.79042	75.8713	-2.95303	0.00995022	AQAELEAQELQR	Plectin OS=Mus musculus GN=Plec PE=1 SV=3
p00207	PLEC_MOUSE	Plec	-4.32107	52.1646	-3.04833	0.0102364	AGVVGPELHEK	Plectin OS=Mus musculus GN=Plec PE=1 SV=3
p04751	PLEC_MOUSE	Plec	-4.49707	67.1962	-2.95008	0.0147393	QLQLAQEAAQK	Plectin OS=Mus musculus GN=Plec PE=1 SV=3
p06798	PLEC_MOUSE	Plec	-3.54863	146.329	-2.82711	0.0154075	YSELTTLTSQYIK	Plectin OS=Mus musculus GN=Plec PE=1 SV=3
p01884	PLEC_MOUSE	Plec	-2.37928	71.9054	-2.60463	0.0179991	GGELVYTDTEAR	Plectin OS=Mus musculus GN=Plec PE=1 SV=3
p04977	PLEC_MOUSE	Plec	-3.14376	34.4116	-2.6895	0.0187042	RLEEQAALHK	Plectin OS=Mus musculus GN=Plec PE=1 SV=3
p04546	PLEC_MOUSE	Plec	-2.6613	72.2093	-2.53792	0.019197	QAEAELALR	Plectin OS=Mus musculus GN=Plec PE=1 SV=3
p06231	PLEC_MOUSE	Plec	-3.61898	136.727	-2.65143	0.0213	VIYQSLEGAVQAGQLK	Plectin OS=Mus musculus GN=Plec PE=1 SV=3
p04704	PLEC_MOUSE	Plec	-2.07962	68.0526	-2.52093	0.0228019	QLAEEDLAQQR	Plectin OS=Mus musculus GN=Plec PE=1 SV=3
p04085	PLEC_MOUSE	Plec	-3.50099	106.177	-2.42394	0.0322981	MGIVGPEFK	Plectin OS=Mus musculus GN=Plec PE=1 SV=3
p04731	PLEC_MOUSE	Plec	-3.68745	101.637	-2.5606	0.0340853	QLLEEELAR	Plectin OS=Mus musculus GN=Plec PE=1 SV=3
p05203	PLEC_MOUSE	Plec	-3.61602	104.156	-2.36291	0.036083	SILDEELQR	Plectin OS=Mus musculus GN=Plec PE=1 SV=3
p03749	PLEC_MOUSE	Plec	-3.70953	58.1742	-2.38499	0.0412973	LQLETTER	Plectin OS=Mus musculus GN=Plec PE=1 SV=3
p05393	PLEC_MOUSE	Plec	-2.63606	128.89	-2.16328	0.0472324	SQVEEELFSVR	Plectin OS=Mus musculus GN=Plec PE=1 SV=3
p04634	PLSL_MOUSE	Lcp1	-4.00789	93.2279	-2.98922	0.0092465	QFVTATDVVR	Plastin-2 OS=Mus musculus GN=Lcp1 PE=1 SV=4
p06575	PLSL_MOUSE	Lcp1	-2.85368	147.978	-2.24582	0.0346818	VYALPEDLVEVNPK	Plastin-2 OS=Mus musculus GN=Lcp1 PE=1 SV=4
p02594	PLST_MOUSE	Pls3	-18.89	83.1363	-3.09055	0.0179958	INNFSADIK	Plastin-3 OS=Mus musculus GN=Pls3 PE=1 SV=3
p02127	PLTP_MOUSE	Pltp	-4.13692	178.026	-2.74589	0.0129059	GVQIPLPEGINFVR	Phospholipid transfer protein OS=Mus musculus GN=Pltp PE=1 SV=1
p00542	PLTP_MOUSE	Pltp	-2.29507	63.5672	-2.62842	0.0176953	AVEPQLEDDER	Phospholipid transfer protein OS=Mus musculus GN=Pltp PE=1 SV=1
p01657	PNPH_MOUSE	Pnp	-2.49737	94.7757	-2.57543	0.0163507	FPAMSDAYDR	Purine nucleoside phosphorylase OS=Mus musculus GN=Pnp PE=1 SV=2
p03918	PNPH_MOUSE	Pnp	-4.02662	148.636	-2.5576	0.0204772	LVFGLLNGR	Purine nucleoside phosphorylase OS=Mus musculus GN=Pnp PE=1 SV=2
p05601	PPIA_MOUSE	Ppia	-2.55244	69.5592	-2.48015	0.0247469	TEWLDGK	Peptidyl-prolyl cis-trans isomerase A OS=Mus musculus GN=Ppia PE=1 SV=2
p03495	PR8A9_MOUSE	Prl8a9	-3.44246	62.5793	-3.60858	0.0117056	LLEDLR
p00057	PRDX1_MOUSE	Prdx1	-2.71868	70.8432	-3.08611	0.00492453	ADEGISFR	Peroxiredoxin-1 OS=Mus musculus GN=Prdx1 PE=1 SV=1
p05485	PRDX1_MOUSE	Prdx1	-3.00351	68.0252	-2.76166	0.0108847	SVDEIIR	Peroxiredoxin-1 OS=Mus musculus GN=Prdx1 PE=1 SV=1
p00512	PRDX1_MOUSE	Prdx1	-2.45271	80.9276	-2.62818	0.0144987	ATAVMPDGQFK	Peroxiredoxin-1 OS=Mus musculus GN=Prdx1 PE=1 SV=1
p00511	PRDX1_MOUSE	Prdx1	-1.88668	56.8855	-2.13615	0.0431305	ATAVMPDGQFK	Peroxiredoxin-1 OS=Mus musculus GN=Prdx1 PE=1 SV=1
p03465	PRDX5_MOUSE	Prdx5	-3.48008	107.931	-3.11239	0.00719878	LLADPTGAFGK	Peroxiredoxin-5, mitochondrial OS=Mus musculus GN=Prdx5 PE=1 SV=2
p06537	PRDX6_MOUSE	Prdx6	-3.44991	141.407	-2.96811	0.016013	VVDSLQLTGTKPVATPVDWK	Peroxiredoxin-6 OS=Mus musculus GN=Prdx6 PE=1 SV=3
p06544	PRDX6_MOUSE	Prdx6	-3.28597	137.499	-2.3493	0.0330625	VVFIFGPDK	Peroxiredoxin-6 OS=Mus musculus GN=Prdx6 PE=1 SV=3
p01151	PROF1_MOUSE	Pfn1	-3.28418	41.3389	-2.37301	0.030632	EGVHGGLINK	Profilin-1 OS=Mus musculus GN=Pfn1 PE=1 SV=2
p05459	PROF1_MOUSE	Pfn1	-2.62889	102.494	-2.24209	0.0359562	STGGAPTFNVTVTMTAK	Profilin-1 OS=Mus musculus GN=Pfn1 PE=1 SV=2
p04721	RADI_MOUSE	Rdx	-5.62475	102.051	-2.63084	0.0221215	QLFDQVVK	Radixin OS=Mus musculus GN=Rdx PE=1 SV=3
p00297	RADI_MOUSE	Rdx	-2.30883	61.6324	-2.33344	0.0280134	ALELEQER	Radixin OS=Mus musculus GN=Rdx PE=1 SV=3
p03937	RAN_MOUSE	Ran	-3.13699	74.7114	-2.64505	0.0177396	LVLVGDGGTGK	GTP-binding nuclear protein Ran OS=Mus musculus GN=Ran PE=1 SV=3
p06558	RB11B_MOUSE	Rab11b	-5.38848	89.4426	-2.66471	0.0328394	VVLIGDSGVGK	Ras-related protein Rab-11B OS=Mus musculus GN=Rab11b PE=1 SV=3
p03662	RBBP7_MOUSE	Rbbp7	-2.97984	130.236	-2.71435	0.0357214	LNVWDLSK	Histone-binding protein RBBP7 OS=Mus musculus GN=Rbbp7 PE=1 SV=1
p05357	RENR_MOUSE	Atp6ap2	-3.82583	67.371	-3.00498	0.0150904	SPGSVVFR	Renin receptor OS=Mus musculus GN=Atp6ap2 PE=1 SV=2
p01970	RIF1_MOUSE	Rif1	-3.02394	62.1543	-2.09968	0.0460726	GLGQLIR	Telomere-associated protein RIF1 OS=Mus musculus GN=Rif1 PE=1 SV=2
p02596	RL7L_MOUSE	Rpl7l1	-3.02394	62.1543	-2.09968	0.0460726	INQLIR
p05837	RLA0_MOUSE	Rplp0	-5.60565	175.949	-2.73916	0.0295189	TSFFQALGITTK	60S acidic ribosomal protein P0 OS=Mus musculus GN=Rplp0 PE=1 SV=3
p03515	RN180_MOUSE	Rnf180	-3.72269	159.577	-2.22638	0.039103	LLFKASDPK	E3 ubiquitin-protein ligase RNF180 OS=Mus musculus GN=Rnf180 PE=1 SV=2
p02368	ROA3_MOUSE	Hnrnpa3	-2.63936	103.63	-2.22785	0.0398018	IETIEVMEDR	Heterogeneous nuclear ribonucleoprotein A3 OS=Mus musculus GN=Hnrnpa3 PE=1 SV=1
p06311	RS19_MOUSE	Rps19	-5.98115	113.285	-5.62832	0.00145398	VLQALEGLK	40S ribosomal protein S19 OS=Mus musculus GN=Rps19 PE=1 SV=3
p04083	RS21_MOUSE	Rps21	-2.69923	76.2051	-3.18641	0.00446687	MGESDDSILR	40S ribosomal protein S21 OS=Mus musculus GN=Rps21 PE=1 SV=1
p00111	RS3_MOUSE	Rps3	-4.13065	115.244	-2.90724	0.0456871	AELNEFLTR	40S ribosomal protein S3 OS=Mus musculus GN=Rps3 PE=1 SV=1
p01473	RSSA_MOUSE	Rpsa	-1.86185	74.3618	-2.12508	0.0446079	FAAATGATPIAGR	40S ribosomal protein SA OS=Mus musculus GN=Rpsa PE=1 SV=4
p03602	S10A6_MOUSE	S100a6	-2.3327	66.2314	-2.37313	0.0260418	LMDDLDR	Protein S100-A6 OS=Mus musculus GN=S100a6 PE=1 SV=3
p00077	SAA3_MOUSE	Saa3	-3.42583	90.5408	-3.40337	0.00269524	ADQFANEWGR	Serum amyloid A-3 protein OS=Mus musculus GN=Saa3 PE=1 SV=1
p00850	SAA3_MOUSE	Saa3	-4.31196	71.7913	-2.67241	0.0286923	DPNHFRPAGLPK	Serum amyloid A-3 protein OS=Mus musculus GN=Saa3 PE=1 SV=1
p02612	SAP_MOUSE	Psap	22.4765	65.8878	16.8966	1.66094e-05	IPEVDMAR	Prosaposin OS=Mus musculus GN=Psap PE=1 SV=2
p02613	SAP_MOUSE	Psap	-2.50759	77.2033	-2.53785	0.0191997	IPEVDMAR	Prosaposin OS=Mus musculus GN=Psap PE=1 SV=2
p03544	SAP_MOUSE	Psap	-3.10218	65.8235	-2.28594	0.0363601	LLLGTEK	Prosaposin OS=Mus musculus GN=Psap PE=1 SV=2
p06370	SEPT8_MOUSE	Septin8	-4.89958	137.865	-3.08576	0.0221551	VNIIPIIAK	Septin-8 OS=Mus musculus GN=Sept8 PE=1 SV=4
p06581	SH3L1_MOUSE	Sh3bgrl	-2.0262	67.9941	-2.12721	0.0435047	VYIASSSGSTAIK	SH3 domain-binding glutamic acid-rich-like protein OS=Mus musculus GN=Sh3bgrl PE=1 SV=1
p04428	SHPS1_MOUSE	Sirpa	-4.2755	93.7555	-3.69742	0.00218045	NNMDFSIR	Tyrosine-protein phosphatase non-receptor type substrate 1 OS=Mus musculus GN=Sirpa PE=1 SV=1
p00347	SNX2_MOUSE	Snx2	-4.99249	91.9076	-3.63922	0.00464633	ALSQLAEVEEK	Sorting nexin-2 OS=Mus musculus GN=Snx2 PE=1 SV=2
p00707	SODC_MOUSE	Sod1	-1.63271	76.3144	-2.26812	0.0352619	DGVANVSIEDR	Superoxide dismutase [Cu-Zn] OS=Mus musculus GN=Sod1 PE=1 SV=2
p02261	SODC_MOUSE	Sod1	-2.4019	54.4635	-2.17744	0.0405246	HVGDLGNVTAGK	Superoxide dismutase [Cu-Zn] OS=Mus musculus GN=Sod1 PE=1 SV=2
p02097	SPB6_MOUSE	Serpinb6	-2.66762	126.557	-2.48367	0.0238225	GTTASQMAQALALDK	Serpin B6 OS=Mus musculus GN=Serpinb6 PE=1 SV=1
p04888	SYNE3_MOUSE	Syne3	-3.02394	62.1543	-2.09968	0.0460726	QVQLLR
p04326	TAGL2_MOUSE	Tagln2	-1.8152	59.6537	-2.35964	0.0264559	NFSDNQLQEGK	Transgelin-2 OS=Mus musculus GN=Tagln2 PE=1 SV=4
p00949	TBA3_MOUSE	Tuba3a	-3.94385	94.5758	-3.12024	0.00821526	DVNAAIATIK	Tubulin alpha-3 chain OS=Mus musculus GN=Tuba3a PE=1 SV=1
p01062	TBA4A_MOUSE	Tuba4a	-3.20382	54.3704	-2.59373	0.0196867	EDMAALEK	Tubulin alpha-4A chain OS=Mus musculus GN=Tuba4a PE=1 SV=1
p01660	TBB1_MOUSE	Tubb1	-2.898	106.178	-2.92352	0.00815652	FPGQLNADLR	Tubulin beta-1 chain OS=Mus musculus GN=Tubb1 PE=1 SV=1
p02713	TBB5_MOUSE	Tubb5	-2.4724	79.5513	-2.2385	0.0435206	ISVYYNEATGGK	Tubulin beta-5 chain OS=Mus musculus GN=Tubb5 PE=1 SV=1
p03095	TCPB_MOUSE	Cct2	-6.32664	104.929	-3.78341	0.00553463	LAVEAVLR	T-complex protein 1 subunit beta OS=Mus musculus GN=Cct2 PE=1 SV=4
p03940	TCPQ_MOUSE	Cct8	-4.11424	104.833	-2.66547	0.0221833	LVPGGGATEIELAK	T-complex protein 1 subunit theta OS=Mus musculus GN=Cct8 PE=1 SV=3
p05943	TCPQ_MOUSE	Cct8	-5.04706	78.9891	-2.82336	0.0496194	VADIALHYANK	T-complex protein 1 subunit theta OS=Mus musculus GN=Cct8 PE=1 SV=3
p02847	TERA_MOUSE	Vcp	-7.77575	90.4411	-4.36114	0.0014655	KGDIFLVR	Transitional endoplasmic reticulum ATPase OS=Mus musculus GN=Vcp PE=1 SV=4
p01922	TERA_MOUSE	Vcp	-3.11865	115.754	-2.22528	0.0409258	GILLYGPPGTGK	Transitional endoplasmic reticulum ATPase OS=Mus musculus GN=Vcp PE=1 SV=4
p06588	TERA_MOUSE	Vcp	-2.88294	107.911	-2.20104	0.0439632	WALSQSNPSALR	Transitional endoplasmic reticulum ATPase OS=Mus musculus GN=Vcp PE=1 SV=4
p03409	TITIN_MOUSE	Ttn	-3.10218	65.4601	-2.3608	0.0323326	LILTEGK	Titin OS=Mus musculus GN=Ttn PE=1 SV=1
p02446	TKT_MOUSE	Tkt	-4.12963	70.7149	-3.39265	0.00375559	IIALDGDTK	Transketolase OS=Mus musculus GN=Tkt PE=1 SV=1
p03098	TKT_MOUSE	Tkt	-2.57655	64.0028	-2.43306	0.0236131	LAVSQVPR	Transketolase OS=Mus musculus GN=Tkt PE=1 SV=1
p02507	TKT_MOUSE	Tkt	-3.04038	139.902	-2.53749	0.0278388	ILATPPQEDAPSVDIANIR	Transketolase OS=Mus musculus GN=Tkt PE=1 SV=1
p02875	TKT_MOUSE	Tkt	-2.91125	57.2454	-2.24925	0.0390613	KISSDLDGHPVPK	Transketolase OS=Mus musculus GN=Tkt PE=1 SV=1
p03464	TLN1_MOUSE	Tln1	-4.40194	162.299	-3.25066	0.00886576	LLAALLEDEGGNGRPLLQAAK	Talin-1 OS=Mus musculus GN=Tln1 PE=1 SV=2
p02259	TPIS_MOUSE	Tpi1	-4.26355	92.923	-2.65759	0.017293	HVFGESDELIGQK	Triosephosphate isomerase OS=Mus musculus GN=Tpi1 PE=1 SV=4
p04963	TPM2_MOUSE	Tpm2	-6.46774	105.223	-4.03478	0.00389985	RIQLVEEELDR	Tropomyosin beta chain OS=Mus musculus GN=Tpm2 PE=1 SV=1
p00011	TPM3_MOUSE	Tpm3	-2.08266	73.4237	-3.02699	0.00584298	AADAEAEVASLNR	Tropomyosin alpha-3 chain OS=Mus musculus GN=Tpm3 PE=1 SV=3
p05604	TRI68_MOUSE	Trim68	-4.12385	71.691	-3.17194	0.00412915	TFAVDVR
p01249	U2AF2_MOUSE	U2af2	-3.43475	145.984	-2.96557	0.0130084	ELLTSFGPLK	Splicing factor U2AF 65 kDa subunit OS=Mus musculus GN=U2af2 PE=1 SV=3
p06207	UB2V2_MOUSE	Ube2v2	-4.65531	92.392	-3.7517	0.00246195	VILQELR	Ubiquitin-conjugating enzyme E2 variant 2 OS=Mus musculus GN=Ube2v2 PE=1 SV=4
p00121	UBA1_MOUSE	Uba1	-2.19778	65.4817	-2.26899	0.03457	AENYDISPADR	Ubiquitin-like modifier-activating enzyme 1 OS=Mus musculus GN=Uba1 PE=1 SV=1
p05745	UBC_MOUSE	Ubc	-2.61702	66.7183	-3.2142	0.00360475	TLSDYNIQK	Polyubiquitin-C OS=Mus musculus GN=Ubc PE=1 SV=2
p01377	UBC_MOUSE	Ubc	-4.87984	100.137	-2.67058	0.0143619	ESTLHLVLR	Polyubiquitin-C OS=Mus musculus GN=Ubc PE=1 SV=2
p04203	UBC_MOUSE	Ubc	-3.28498	87.792	-2.13473	0.0442444	MQIFVK	Polyubiquitin-C OS=Mus musculus GN=Ubc PE=1 SV=2
p05772	UBE2N_MOUSE	Ube2n	-1.85689	56.109	-2.48118	0.0205391	TNEAQAIETAR	Ubiquitin-conjugating enzyme E2 N OS=Mus musculus GN=Ube2n PE=1 SV=1
p06302	VAT1_MOUSE	Vat1	-5.30929	91.9197	-4.15433	0.000863248	VLLVPGPEK	Synaptic vesicle membrane protein VAT-1 homolog OS=Mus musculus GN=Vat1 PE=1 SV=3
p01489	VIME_MOUSE	Vim	-2.94706	67.6591	-2.93252	0.00712088	FANYIDK	Vimentin OS=Mus musculus GN=Vim PE=1 SV=3
p03720	VIME_MOUSE	Vim	-2.6095	67.7412	-2.83425	0.00898603	LQDEIQNMK	Vimentin OS=Mus musculus GN=Vim PE=1 SV=3
p01073	VIME_MOUSE	Vim	-3.86348	89.0068	-2.89556	0.0101186	EEAESTLQSFR	Vimentin OS=Mus musculus GN=Vim PE=1 SV=3
p01477	VIME_MOUSE	Vim	-2.316	73.5809	-2.69319	0.0124859	FADLSEAANR	Vimentin OS=Mus musculus GN=Vim PE=1 SV=3
p00702	VIME_MOUSE	Vim	-2.99191	66.9832	-2.91792	0.0141587	DGQVINETSQHHDDLE	Vimentin OS=Mus musculus GN=Vim PE=1 SV=3
p03729	VIME_MOUSE	Vim	-2.051	66.8218	-2.10815	0.0472868	LQEEMLQR	Vimentin OS=Mus musculus GN=Vim PE=1 SV=3
p00269	VINC_MOUSE	Vim	-4.14077	101.285	-2.6199	0.0225707	ALASQLQDSLK	Vinculin OS=Mus musculus GN=Vcl PE=1 SV=4
p04237	VINC_MOUSE	Vcl	-2.62025	107.393	-2.40182	0.0336237	MTGLVDEAIDTK	Vinculin OS=Mus musculus GN=Vcl PE=1 SV=4
p05612	VPS18_MOUSE	Vps18	-4.60381	70.6922	-2.94684	0.0123493	TFLSSPR
p02572	VPS35_MOUSE	Vps35	-4.10564	106.937	-3.76292	0.00977447	ILVGTNLVR	Vacuolar protein sorting-associated protein 35 OS=Mus musculus GN=Vps35 PE=1 SV=1
p02298	WDR1_MOUSE	Wdr1	-2.9287	47.6318	-2.79666	0.0271963	IAVVGEGR	WD repeat-containing protein 1 OS=Mus musculus GN=Wdr1 PE=1 SV=3
p04343	ZN329_MOUSE	Znf329	-3.02394	62.1543	-2.09968	0.0460726	NIAGLIR
