# Supplementary material for: RAS-p110α signalling in macrophages is required for effective inflammatory response and resolution of inflammation
Source: Research Square preprint supplement (doi:10.21203/rs.3.rs-3191814/v1), 2023-08-18
Supplement: Supplementary file 2 [file 6ffd31792427822ed2517248.xlsx]

## Sheet: RBD|- vs WT|- steady state
db_ID	UniProt_EntryName	Gene_Name	log2(FC)	AveSignal	t-statistic	p.value	Peptide	Protein_Description
p00979	1433E_MOUSE	Ywhae	-2.62309	74.0328	-2.39545	0.0251861	EAAENSLVAYK	14-3-3 protein epsilon OS=Mus musculus GN=Ywhae PE=1 SV=1
p00568	1433F_MOUSE	Ywhah	-3.80235	87.7169	-2.81089	0.0120947	AVTELNEPLSNEDR	14-3-3 protein eta OS=Mus musculus GN=Ywhah PE=1 SV=2
p04399	1433S_MOUSE	Sfn	-4.61501	105.358	-2.21317	0.0418995	NLLSVAYK	14-3-3 protein sigma OS=Mus musculus GN=Sfn PE=1 SV=2
p02233	ACTBL_MOUSE	Actbl2	-4.77874	49.5456	-2.68071	0.0158765	HQGVMVGMGQK	Beta-actin-like protein 2 OS=Mus musculus GN=Actbl2 PE=1 SV=1
p00304	AK1A1_MOUSE	Akr1a1 Akr1a4	-6.58145	89.033	-3.51125	0.00318869	ALEVLVAK	Alcohol dehydrogenase [NADP(+)] OS=Mus musculus GN=Akr1a1 PE=1 SV=3
p04738	ALDOA_MOUSE	Aldoa	-5.52762	85.9857	-2.79612	0.013658	QLLLTADDR	Fructose-bisphosphate aldolase A OS=Mus musculus GN=Aldoa PE=1 SV=2
p02412	ALDOA_MOUSE	Aldoa	-6.47337	168.832	-2.34654	0.0332396	IGEHTPSALAIMENANVLAR	Fructose-bisphosphate aldolase A OS=Mus musculus GN=Aldoa PE=1 SV=2
p01918	ALDOA_MOUSE	Aldoa	-4.06699	89.0027	-2.26262	0.0390805	GILAADESTGSIAK	Fructose-bisphosphate aldolase A OS=Mus musculus GN=Aldoa PE=1 SV=2
p00055	ALDOA_MOUSE	Aldoa	-4.37786	92.1191	-2.17614	0.0473418	ADDGRPFPQVIK	Fructose-bisphosphate aldolase A OS=Mus musculus GN=Aldoa PE=1 SV=2
p05369	ALDR_MOUSE	Akr1b1	-3.25918	50.9112	-2.53517	0.0298989	SPPGQVTEAVK	Aldose reductase OS=Mus musculus GN=Akr1b1 PE=1 SV=3
p03031	AN32B_MOUSE	Anp32b	-8.63248	156.829	-2.66971	0.045628	LAEELPSLTHLNLSGNNLK	Acidic leucine-rich nuclear phosphoprotein 32 family member B OS=Mus musculus GN=Anp32b PE=1 SV=1
p03304	APOE_MOUSE	Apoe	-2.90868	87.2331	-2.39517	0.0313119	LGADMEDLR	Apolipoprotein E OS=Mus musculus GN=Apoe PE=1 SV=2
p02551	ARF4_MOUSE	Arf4	-5.45667	120.569	-2.55781	0.0311597	ILMVGLDAAGK	ADP-ribosylation factor 4 OS=Mus musculus GN=Arf4 PE=1 SV=2
p04971	ARP2_MOUSE	Arf4	-5.56573	40.9511	-3.21875	0.00680207	RLDIAGR	Actin-related protein 2 OS=Mus musculus GN=Actr2 PE=1 SV=1
p06167	ARP2_MOUSE	Actr2	-3.92057	56.1917	-2.42426	0.030838	VGNIEIK	Actin-related protein 2 OS=Mus musculus GN=Actr2 PE=1 SV=1
p02747	ARPC4_MOUSE	Arpc4	-4.41613	111.623	-2.45985	0.0319373	IVAEEFLK	Actin-related protein 2/3 complex subunit 4 OS=Mus musculus GN=Arpc4 PE=1 SV=3
p02534	BGH3_MOUSE	Tgfbi	-5.50174	91.7803	-2.93345	0.00933927	ILGDPEALR	Transforming growth factor-beta-induced protein ig-h3 OS=Mus musculus GN=Tgfbi PE=1 SV=1
p00061	BGH3_MOUSE	Tgfbi	-5.1444	72.2161	-2.3897	0.0488845	ADHHATNGVVHLIDK	Transforming growth factor-beta-induced protein ig-h3 OS=Mus musculus GN=Tgfbi PE=1 SV=1
p02283	BLVRB_MOUSE	Blvrb	-8.23169	101.752	-3.97429	0.00188586	IAIFGATGR	Flavin reductase (NADPH) OS=Mus musculus GN=Blvrb PE=1 SV=3
p04893	C1QC_MOUSE	C1qc	-3.7689	72.8101	-2.14293	0.0453785	QVSSGGVLLR	Complement C1q subcomponent subunit C OS=Mus musculus GN=C1qc PE=1 SV=2
p00699	CALM1_MOUSE	Calm1	-3.29594	101.499	-2.36434	0.031162	DGNGYISAAELR	Calmodulin OS=Mus musculus GN=Calm1 PE=1 SV=2
p05860	CATD_MOUSE	Ctsd	-3.7292	107.466	-2.15842	0.0447565	TTEPVSELLK	Cathepsin D OS=Mus musculus GN=Ctsd PE=1 SV=1
p03549	CAZA1_MOUSE	Capza1	-4.90584	133.316	-2.64031	0.0186551	LLLNNDNLLR	F-actin-capping protein subunit alpha-1 OS=Mus musculus GN=Capza1 PE=1 SV=4
p02009	CD14_MOUSE	Cd14	-4.02664	69.6199	-2.40057	0.0375996	GNPFLDSESHSEK	Monocyte differentiation antigen CD14 OS=Mus musculus GN=Cd14 PE=1 SV=1
p02687	CLH1_MOUSE	Cltc	-9.27808	156.394	-2.34448	0.0476198	ISGETIFVTAPHEATAGIIGVNR	Clathrin heavy chain 1 OS=Mus musculus GN=Cltc PE=1 SV=3
p05695	CMPK2_MOUSE	Cmpk2	-7.08929	97.6641	-2.47981	0.035384	TKEEAELEANNVFR	UMP-CMP kinase 2, mitochondrial OS=Mus musculus GN=Cmpk2 PE=1 SV=2
p02363	DESM_MOUSE	Des	-8.63594	148.713	-3.43881	0.0278125	IESLNEEIAFLKK	Desmin OS=Mus musculus GN=Des PE=1 SV=3
p05053	DPYL2_MOUSE	Dpysl2	-4.37311	62.8757	-2.50284	0.0244915	SAAEVIAQAR	Dihydropyrimidinase-related protein 2 OS=Mus musculus GN=Dpysl2 PE=1 SV=2
p04320	DYL2_MOUSE	Dynll2	-8.24626	66.1992	-3.27247	0.0323264	NFGSYVTHETK	Dynein light chain 2, cytoplasmic OS=Mus musculus GN=Dynll2 PE=1 SV=1
p00729	ECM1_MOUSE	Ecm1	-5.19102	146.052	-4.09735	0.00669719	DILTLDLSR	Extracellular matrix protein 1 OS=Mus musculus GN=Ecm1 PE=1 SV=2
p02417	EF1A2_MOUSE	Eef1a2	-4.0682	90.3055	-2.38601	0.0298533	IGGIGTVPVGR	Elongation factor 1-alpha 2 OS=Mus musculus GN=Eef1a2 PE=1 SV=1
p05782	EF1B_MOUSE	Eef1b	-3.66103	170.142	-2.27517	0.0321709	TPAGLQVLNDYLADK	Elongation factor 1-beta OS=Mus musculus GN=Eef1b PE=1 SV=5
p06134	EF2_MOUSE	Eef2	-5.91556	101.589	-2.97047	0.00863424	VFSGVVSTGLK	Elongation factor 2 OS=Mus musculus GN=Eef2 PE=1 SV=2
p02580	EF2_MOUSE	Eef2	-3.19095	68.6612	-2.69037	0.0316528	IMGPNYTPGK	Elongation factor 2 OS=Mus musculus GN=Eef2 PE=1 SV=2
p06367	EF2_MOUSE	Eef2	-3.23794	105.168	-2.23066	0.0368161	VNFTVDQIR	Elongation factor 2 OS=Mus musculus GN=Eef2 PE=1 SV=2
p00460	EF2_MOUSE	Eef2	-4.55647	126.757	-2.22125	0.0449215	ARPFPDGLAEDIDKGEVSAR	Elongation factor 2 OS=Mus musculus GN=Eef2 PE=1 SV=2
p06113	ESTD_MOUSE	Esd	-4.60197	68.4524	-2.62372	0.0211881	VFEHSSVELK	S-formylglutathione hydrolase OS=Mus musculus GN=Esd PE=1 SV=1
p03613	FABP5_MOUSE	Fabp5	-5.83684	107.625	-3.93606	0.00585772	LMESHGFEEYMK	Fatty acid-binding protein, epidermal OS=Mus musculus GN=Fabp5 PE=1 SV=3
p03611	FABP5_MOUSE	Fabp5	9.63746	90.4949	2.87799	0.0209499	LMESHGFEEYMK	Fatty acid-binding protein, epidermal OS=Mus musculus GN=Fabp5 PE=1 SV=3
p06529	FLNA_MOUSE	Flna	-5.26445	167.119	-2.85913	0.0248898	VTYTPMAPGSYLISIK	Filamin-A OS=Mus musculus GN=Flna PE=1 SV=5
p06706	FLNA_MOUSE	Flna	-4.14179	127.557	-2.60133	0.0290265	YIPVQQGPVGVNVTYGGDHIPK	Filamin-A OS=Mus musculus GN=Flna PE=1 SV=5
p01763	G3P_MOUSE	Gapdh	-3.89247	76.4592	-2.44953	0.0248544	GAAQNIIPASTGAAK	Glyceraldehyde-3-phosphate dehydrogenase OS=Mus musculus GN=Gapdh PE=1 SV=2
p02183	G6PI_MOUSE	Gpi	-9.24929	61.222	-6.73154	0.000159963	HFVALSTNTAK	Glucose-6-phosphate isomerase OS=Mus musculus GN=Gpi PE=1 SV=4
p02266	GELS_MOUSE	Gsn	-4.76822	69.4605	-3.45218	0.0190222	HVVPNEVVVQR	Gelsolin OS=Mus musculus GN=Gsn PE=1 SV=3
p02970	GLRX1_MOUSE	Glrx	-7.67625	134.095	-3.57431	0.00745677	KTQEILSQLPFK	Glutaredoxin-1 OS=Mus musculus GN=Glrx PE=1 SV=3
p02969	GLRX1_MOUSE	Glrx	-6.62854	138.508	-3.66024	0.0229183	KTQEILSQLPFK	Glutaredoxin-1 OS=Mus musculus GN=Glrx PE=1 SV=3
p05810	GLRX1_MOUSE	Glrx	-6.9582	150.09	-3.1783	0.0255536	TQEILSQLPFK	Glutaredoxin-1 OS=Mus musculus GN=Glrx PE=1 SV=3
p00959	GPNMB_MOUSE	Gpnmb	-2.5824	183.938	-2.13527	0.0498017	DVYVITDQIPVFVTMSQK	Transmembrane glycoprotein NMB OS=Mus musculus GN=Gpnmb PE=1 SV=2
p01636	GRIK1_MOUSE	Grik1	-7.35968	88.4845	-2.79172	0.0212986	FMNLIK	Glutamate receptor ionotropic, kainate 1 OS=Mus musculus GN=Grik1 PE=2 SV=2
p01581	HA13_MOUSE	H2-D1	-4.3372	150.125	-3.5596	0.0124045	FISVGYVDNTEFVR	H-2 class I histocompatibility antigen, D-K alpha chain OS=Mus musculus GN=H2-D1 PE=1 SV=1
p01580	HA1K_MOUSE	H2-K1	-4.3372	150.125	-3.5596	0.0124045	FISVGYVDDTQFVR	H-2 class I histocompatibility antigen, K-K alpha chain OS=Mus musculus GN=H2-K1 PE=1 SV=1
p03379	HBB2_MOUSE	Hbb-b2	-4.66941	85.5831	-2.92283	0.0140356	LHVDPENFR	Hemoglobin subunit beta-2 OS=Mus musculus GN=Hbb-b2 PE=1 SV=2
p06735	HMOX1_MOUSE	Hmox1	-3.00732	114.706	-2.29491	0.0408019	YLGDLSGGQVLK	Heme oxygenase 1 OS=Mus musculus GN=Hmox1 PE=1 SV=1
p01346	HOMEZ_MOUSE	Homez	-4.54273	86.8416	-2.31735	0.0312811	EQLAILK
p06185	IF5A2_MOUSE	Eif5a2	-10.5236	158.266	-3.29315	0.0171156	VHLVGIDIFTGK	Eukaryotic translation initiation factor 5A-2 OS=Mus musculus GN=Eif5a2 PE=1 SV=3
p06186	IF5A2_MOUSE	Eif5a2	-6.39886	156.099	-2.49305	0.0207327	VHLVGIDIFTGK	Eukaryotic translation initiation factor 5A-2 OS=Mus musculus GN=Eif5a2 PE=1 SV=3
p05312	IPO5_MOUSE	Ipo5	-4.42108	123.467	-3.64426	0.00852747	SLVEIADTVPK	Importin-5 OS=Mus musculus GN=Ipo5 PE=1 SV=3
p03023	IQGA1_MOUSE	Iqgap1	-4.81313	133.829	-3.12844	0.020998	LAAVAAINAAIQK	Ras GTPase-activating-like protein IQGAP1 OS=Mus musculus GN=Iqgap1 PE=1 SV=2
p01911	ITIH3_MOUSE	Itih3	-5.80756	72.6711	-4.14492	0.00949991	GHVSFKPSLDQQR	Inter-alpha-trypsin inhibitor heavy chain H3 OS=Mus musculus GN=Itih3 PE=1 SV=3
p01483	ITIH3_MOUSE	Itih3	-4.75206	43.9819	-2.28199	0.048835	FAHNVVTTR	Inter-alpha-trypsin inhibitor heavy chain H3 OS=Mus musculus GN=Itih3 PE=1 SV=3
p06507	K1C27_MOUSE	Krt27	-3.99871	57.7892	-2.28197	0.0401711	VTMQNLNDR	Keratin, type I cytoskeletal 27 OS=Mus musculus GN=Krt27 PE=1 SV=1
p03892	KAP0_MOUSE	Prkar1a	-4.08671	156.64	-2.57432	0.0429727	LTVADALEPVQFEDGQK	cAMP-dependent protein kinase type I-alpha regulatory subunit OS=Mus musculus GN=Prkar1a PE=1 SV=3
p01975	KATL2_MOUSE	Katnal2	-6.58926	115.754	-3.08282	0.00718895	GLLLYGPPGTGK	Katanin p60 ATPase-containing subunit A-like 2 OS=Mus musculus GN=Katnal2 PE=2 SV=2
p01641	KCD12_MOUSE	Kctd12	-6.46669	166.101	-2.36965	0.0356451	FNFLEQAFDK	BTB/POZ domain-containing protein KCTD12 OS=Mus musculus GN=Kctd12 PE=1 SV=1
p01821	KPYM_MOUSE	Pkm	-5.18495	88.3518	-3.05771	0.00757539	GDYPLEAVR	Pyruvate kinase PKM OS=Mus musculus GN=Pkm PE=1 SV=4
p03381	KSYK_MOUSE	Syk	-5.64892	91.9953	-2.91747	0.0121124	LIATTAHEK	Tyrosine-protein kinase SYK OS=Mus musculus GN=Syk PE=1 SV=2
p01875	LASP1_MOUSE	Lasp1	-3.19614	120.216	-2.38764	0.0330195	GFSVVADTPELQR	LIM and SH3 domain protein 1 OS=Mus musculus GN=Lasp1 PE=1 SV=1
p04813	LASP1_MOUSE	Lasp1	-3.17596	40.9973	-2.26497	0.0473181	QQSELQSQVR	LIM and SH3 domain protein 1 OS=Mus musculus GN=Lasp1 PE=1 SV=1
p05045	LDHA_MOUSE	Ldha	-7.48129	63.7103	-2.13969	0.0464408	RVHPISTMIK	L-lactate dehydrogenase A chain OS=Mus musculus GN=Ldha PE=1 SV=3
p03928	LDHC_MOUSE	Ldhc	-5.88676	88.5775	-2.95233	0.00897303	LVIITAGAR	L-lactate dehydrogenase C chain OS=Mus musculus GN=Ldhc PE=1 SV=2
p05998	LEG3_MOUSE	Lgals3	-7.70489	86.0566	-3.33027	0.00898463	VAVNDAHLLQYNHR	Galectin-3 OS=Mus musculus GN=Lgals3 PE=1 SV=3
p05997	LEG3_MOUSE	Lgals3	-4.86224	85.0305	-2.94024	0.00920594	VAVNDAHLLQYNHR	Galectin-3 OS=Mus musculus GN=Lgals3 PE=1 SV=3
p05538	LMNA_MOUSE	Lmna	-4.15277	101.229	-2.31311	0.0328443	TALINSTGEEVAMR	Prelamin-A/C OS=Mus musculus GN=Lmna PE=1 SV=2
p00433	MOES_MOUSE	Msn	-4.32043	48.1967	-2.69292	0.0136705	AQMVQEDLEK	Moesin OS=Mus musculus GN=Msn PE=1 SV=3
p05813	MOES_MOUSE	Msn	-5.18351	143.281	-2.70895	0.0435699	TQEQLASEMAELTAR	Moesin OS=Mus musculus GN=Msn PE=1 SV=3
p01144	MYL3_MOUSE	Myl3	-3.81919	73.8148	-3.51726	0.00431583	EGNGTVMGAELR	Myosin light chain 3 OS=Mus musculus GN=Myl3 PE=1 SV=4
p01142	MYL6_MOUSE	Myl6	-3.81919	73.8148	-3.51726	0.00431583	EGNGTVMGAEIR	Myosin light polypeptide 6 OS=Mus musculus GN=Myl6 PE=1 SV=3
p06350	NDKA_MOUSE	Nme1	-3.00862	84.8887	-2.18166	0.0396746	VMLGETNPADSKPGTIR	Nucleoside diphosphate kinase A OS=Mus musculus GN=Nme1 PE=1 SV=1
p05608	NDKB_MOUSE	Nme2	-4.42424	94.983	-2.20593	0.039336	TFIAIKPDGVQR	Nucleoside diphosphate kinase B OS=Mus musculus GN=Nme2 PE=1 SV=1
p01835	OTUB1_MOUSE	Otub1	-4.26562	71.2432	-3.01089	0.00943345	GEGGTTNPHVFPEGSEPK	Ubiquitin thioesterase OTUB1 OS=Mus musculus GN=Otub1 PE=1 SV=2
p05816	PARK7_MOUSE	Park7	-3.57628	172.057	-2.44281	0.0452505	TQGPYDVVVLPGGNLGAQNLSESPMVK	Protein deglycase DJ-1 OS=Mus musculus GN=Park7 PE=1 SV=1
p02289	PCBP1_MOUSE	Pcbp1	-4.21269	48.0606	-2.17261	0.0476536	IANPVEGSSGR	Poly(rC)-binding protein 1 OS=Mus musculus GN=Pcbp1 PE=1 SV=1
p06329	PEBP1_MOUSE	Pebp1	-5.33878	159.435	-2.61691	0.0406134	VLTPTQVMNRPSSISWDGLDPGK	Phosphatidylethanolamine-binding protein 1 OS=Mus musculus GN=Pebp1 PE=1 SV=3
p04009	PERI_MOUSE	Prph	-8.82554	132	-3.02913	0.00666209	MALDIEIATYR	Peripherin OS=Mus musculus GN=Prph PE=1 SV=2
p01696	PGAM1_MOUSE	Pgam1	-3.86373	123.974	-2.63326	0.0234897	FSGWYDADLSPAGHEEAK	Phosphoglycerate mutase 1 OS=Mus musculus GN=Pgam1 PE=1 SV=3
p04123	PIPNA_MOUSE	Pitpna	-8.46627	99.9603	-2.72852	0.0425819	MLAPEGALNIHEK	Phosphatidylinositol transfer protein alpha isoform OS=Mus musculus GN=Pitpna PE=1 SV=2
p01679	PLD4_MOUSE	Pld4	-5.82449	111.652	-2.25504	0.0481195	FQQLLLR	Phospholipase D4 OS=Mus musculus GN=Pld4 PE=1 SV=1
p03894	PLEC_MOUSE	Plec	-5.18671	65.784	-2.31556	0.0434352	LTVDEAVR	Plectin OS=Mus musculus GN=Plec PE=1 SV=3
p02196	PLF4_MOUSE	Pf4	-9.87763	84.6505	-3.25665	0.00877699	HITSLEVIK	Platelet factor 4 OS=Mus musculus GN=Pf4 PE=1 SV=1
p06817	PLSL_MOUSE	Lcp1	-4.7287	172.895	-2.57042	0.0305259	YTLNILEDIGGGQK	Plastin-2 OS=Mus musculus GN=Lcp1 PE=1 SV=4
p00594	PLSL_MOUSE	Lcp1	-4.53653	119.983	-2.28069	0.046077	AYYHLLEQVAPK	Plastin-2 OS=Mus musculus GN=Lcp1 PE=1 SV=4
p04114	PLST_MOUSE	Pls3	-3.00524	139.278	-2.20917	0.0384842	MINLSVPDTIDER	Plastin-3 OS=Mus musculus GN=Pls3 PE=1 SV=3
p06516	PLTP_MOUSE	Pltp	-7.48954	101.221	-3.70267	0.00790186	VTSAALDLVK	Phospholipid transfer protein OS=Mus musculus GN=Pltp PE=1 SV=1
p02128	PLTP_MOUSE	Pltp	-5.23056	178.646	-2.98934	0.0176952	GVQIPLPEGINFVR	Phospholipid transfer protein OS=Mus musculus GN=Pltp PE=1 SV=1
p06462	PPIA_MOUSE	Ppia	-4.11789	143.721	-2.21186	0.0368028	VSFELFADKVPK	Peptidyl-prolyl cis-trans isomerase A OS=Mus musculus GN=Ppia PE=1 SV=2
p05303	PRDX2_MOUSE	Prdx2	-7.86175	83.034	-2.76504	0.0162019	SLSQNYGVLK	Peroxiredoxin-2 OS=Mus musculus GN=Prdx2 PE=1 SV=3
p03465	PRDX5_MOUSE	Prdx5	-3.75675	107.931	-2.38908	0.0306031	LLADPTGAFGK	Peroxiredoxin-5, mitochondrial OS=Mus musculus GN=Prdx5 PE=1 SV=2
p00541	PSA3_MOUSE	Psma3	-3.00883	69.7098	-2.34945	0.0472544	AVENSSTAIGIR	Proteasome subunit alpha type-3 OS=Mus musculus GN=Psma3 PE=1 SV=3
p00403	PSME2_MOUSE	Psme2	-4.11663	126.518	-2.43162	0.0318502	APLDIPIPDPPPKDDEMETDKQEK	Proteasome activator complex subunit 2 OS=Mus musculus GN=Psme2 PE=1 SV=4
p03937	RAN_MOUSE	Ran	-4.31902	74.7114	-2.4182	0.0280046	LVLVGDGGTGK	GTP-binding nuclear protein Ran OS=Mus musculus GN=Ran PE=1 SV=3
p00739	RINI_MOUSE	Rnh1	-2.8506	163.643	-2.57552	0.0373374	DISSAVQANPALTELSLR	Ribonuclease inhibitor OS=Mus musculus GN=Rnh1 PE=1 SV=1
p03275	ROA3_MOUSE	Hnrnpa3	-4.21423	179.768	-2.27442	0.0465684	LFIGGLSFETTDDSLR	Heterogeneous nuclear ribonucleoprotein A3 OS=Mus musculus GN=Hnrnpa3 PE=1 SV=1
p01257	S10A4_MOUSE	S100a4	-4.96465	118.333	-2.46407	0.0255562	ELPSFLGK	Protein S100-A4 OS=Mus musculus GN=S100a4 PE=1 SV=1
p00850	SAA3_MOUSE	Saa3	-5.15245	71.7913	-2.89574	0.0203919	DPNHFRPAGLPK	Serum amyloid A-3 protein OS=Mus musculus GN=Saa3 PE=1 SV=1
p02567	SELB_MOUSE	Eefsec	-8.86181	119.454	-3.5864	0.024426	ILTPTLK	Selenocysteine-specific elongation factor OS=Mus musculus GN=Eefsec PE=1 SV=2
p00754	SGPL1_MOUSE	Sgpl1	-5.81057	170.326	-3.09284	0.0179386	DLALEKGIK	Sphingosine-1-phosphate lyase 1 OS=Mus musculus GN=Sgpl1 PE=1 SV=1
p02261	SODC_MOUSE	Sod1	-5.92187	54.4635	-3.18209	0.00433298	HVGDLGNVTAGK	Superoxide dismutase [Cu-Zn] OS=Mus musculus GN=Sod1 PE=1 SV=2
p02097	SPB6_MOUSE	Serpinb6	-4.42458	126.557	-2.57216	0.0198734	GTTASQMAQALALDK	Serpin B6 OS=Mus musculus GN=Serpinb6 PE=1 SV=1
p05404	STB5L_MOUSE	Stxbp5l	-7.12546	61.5894	-5.08652	0.00412406	SRSSSISSIDK	Syntaxin-binding protein 5-like OS=Mus musculus GN=Stxbp5l PE=1 SV=1
p02562	TALD3_MOUSE	Talpid3	-9.60934	167.907	-3.65754	0.00661756	ILRGVQNNKK	Protein TALPID3 OS=Mus musculus GN=Talpid3 PE=1 SV=1
p04723	TBA8_MOUSE	Tuba8	-4.29694	126.221	-2.22659	0.0365969	QLFHPEQLITGK	Tubulin alpha-8 chain OS=Mus musculus GN=Tuba8 PE=1 SV=1
p06760	TBB4A_MOUSE	Tubb4a	-5.76779	145.122	-2.76191	0.0250109	YLTVAAVFR	Tubulin beta-4A chain OS=Mus musculus GN=Tubb4a PE=1 SV=3
p01922	TERA_MOUSE	Vcp	-6.58926	115.754	-3.08282	0.00718895	GILLYGPPGTGK	Transitional endoplasmic reticulum ATPase OS=Mus musculus GN=Vcp PE=1 SV=4
p06588	TERA_MOUSE	Vcp	-5.00155	107.911	-2.71525	0.0160634	WALSQSNPSALR	Transitional endoplasmic reticulum ATPase OS=Mus musculus GN=Vcp PE=1 SV=4
p03355	TKT_MOUSE	Tkt	-4.71784	101.442	-2.4258	0.0267944	LGQSDPAPLQHQVDIYQK	Transketolase OS=Mus musculus GN=Tkt PE=1 SV=1
p02446	TKT_MOUSE	Tkt	-4.54961	70.7149	-2.22514	0.0409372	IIALDGDTK	Transketolase OS=Mus musculus GN=Tkt PE=1 SV=1
p05228	TKT_MOUSE	Tkt	3.44586	183.665	2.56959	0.0432438	SKDDQVTVIGAGVTLHEALAAAESLKK	Transketolase OS=Mus musculus GN=Tkt PE=1 SV=1
p06144	TLN1_MOUSE	Tln1	-3.40156	118.313	-2.38927	0.0410103	VGDDPAVWQLK	Talin-1 OS=Mus musculus GN=Tln1 PE=1 SV=2
p01411	TLN2_MOUSE	Tln2	-5.07328	58.3018	-2.61716	0.0351626	EVANSTANLVK	Talin-2 OS=Mus musculus GN=Tln2 PE=1 SV=3
p03339	TPD52_MOUSE	Tpd52	-3.57197	131.59	-2.19041	0.0428431	LGISSLQEFK	Tumor protein D52 OS=Mus musculus GN=Tpd52 PE=1 SV=2
p05692	TSP1_MOUSE	Thbs1	-5.99335	135.092	-2.7665	0.0283894	TIVTTLQDSIR	Thrombospondin-1 OS=Mus musculus GN=Thbs1 PE=1 SV=1
p04203	UBC_MOUSE	Ubc	-6.32829	87.792	-3.07201	0.00560491	MQIFVK	Polyubiquitin-C OS=Mus musculus GN=Ubc PE=1 SV=2
p06302	VAT1_MOUSE	Vat1	-5.22864	91.9197	-2.90915	0.0108743	VLLVPGPEK	Synaptic vesicle membrane protein VAT-1 homolog OS=Mus musculus GN=Vat1 PE=1 SV=3
p00702	VIME_MOUSE	Vim	-2.42628	66.9832	-2.43263	0.0335095	DGQVINETSQHHDDLE	Vimentin OS=Mus musculus GN=Vim PE=1 SV=3
p01187	VP26A_MOUSE	Vps26a	-3.9594	105.018	-3.35981	0.0157751	EITGIGPSTTTETETIAK	Vacuolar protein sorting-associated protein 26A OS=Mus musculus GN=Vps26a PE=1 SV=1
p02298	WDR1_MOUSE	Wdr1	-3.87118	47.6318	-2.62349	0.0348437	IAVVGEGR	WD repeat-containing protein 1 OS=Mus musculus GN=Wdr1 PE=1 SV=3
p06582	WDR1_MOUSE	Wdr1	-4.49047	129.109	-2.13972	0.0464386	VYSILASTLK	WD repeat-containing protein 1 OS=Mus musculus GN=Wdr1 PE=1 SV=3
